# Supplementary material
Source: publisher figshare collection journal article supplement (https://gsapubs.figshare.com/ndownloader/files/23307224)
Supplement: Supplementary file 1 [file 23307224]

## Sheet: Broken Hill
Broken Hill GRS Data
K (wt%)	U (ppm)	Th (ppm)	UTM Zone	Easting	Northing
2.4	2.44461	18.4	54J	553537	6494756
2.2	1.98336	18.7	54J	553537	6494756
4.6	3.59773	23.9	54J	553537	6494756
2.6	1.91304	18.5	54J	553537	6494756
1.6	1.47599	14.9	54J	553537	6494756
2.2	2.39849	21.4	54J	553537	6494756
3.9	2.44461	24	54J	553490	6494814
2.5	2.16786	16.8	54J	553490	6494814
0.7	1.06087	6.1	54J	553490	6494814
4.8	2.26011	22.5	54J	553490	6494814
0.8	1.29149	6.3	54J	553475	6494767
0.8	2.39849	9.9	54J	553475	6494767
2.3	1.75274	18.8	54J	553397	6494724
2.8	1.93724	18.7	54J	553397	6494724
2.6	1.52212	14.7	54J	553397	6494724
2.1	2.53686	14.2	54J	553319	6494711
3.6	2.07561	24.5	54J	553319	6494711
3.6	2.95198	25.6	54J	553319	6494711
3.9	3.41323	24.9	54J	553319	6494711
3.4	2.53686	23.1	54J	553319	6494711
2.8	2.58299	23.1	54J	553319	6494711
2.8	1.66049	23.2	54J	553319	6494711
2.6	2.07561	20.9	54J	553319	6494711
3.9	2.95198	30.1	54J	553263	6494297
3.2	2.30624	20.8	54J	553263	6494297
2.6	1.93724	21.1	54J	553263	6494297
3.8	2.62911	24	54J	553263	6494297
3.5	1.29149	28.1	54J	553263	6494297
3.8	3.64386	28.9	54J	553263	6494297
4.3	2.76749	30.1	54J	553263	6494297
3.9	2.85974	27.6	54J	553263	6494297
3.9	1.79887	25.4	54J	553219	6494539
3.6	2.58299	21.9	54J	553219	6494539
3.4	2.53686	23.7	54J	553219	6494539
3.3	1.93724	23.7	54J	553219	6494539
3.5	1.33762	28.4	54J	553167	6494321
3.6	1.42987	22.6	54J	553167	6494321
2.7	0.96862	22.3	54J	553167	6494321
4.9	2.16786	31.8	54J	553167	6494321
3.4	1.24537	23.7	54J	553167	6494321
1.4	1.70662	11.4	54J	553128	6494284
3.8	2.49074	26.4	54J	553128	6494284
4.2	1.66049	25	54J	553128	6494284
3.8	1.70662	20	54J	553128	6494284
5.4	3.45936	29.3	54J	553128	6494284
5.4	2.07561	25.4	54J	552967	6494232
1.7	1.52212	14.5	54J	552967	6494232
4.7	3.13648	28.9	54J	552967	6494232
4.6	2.99811	26.2	54J	552967	6494232
4.2	3.36711	25.4	54J	552967	6494232
3.1	1.29149	21.9	54J	552926	6494226
3.3	1.24537	24	54J	552926	6494226
3.4	1.38374	27.1	54J	552926	6494226
3.6	1.61437	21.2	54J	552926	6494226
4	1.75274	25.5	54J	552926	6494226
3.4	1.84499	21.3	54J	552887	6494243
3.1	2.26011	24.3	54J	552887	6494243
3.7	2.76749	22.6	54J	552887	6494243
3.3	3.22873	34.9	54J	552887	6494243
2.1	2.26011	17.3	54J	552887	6494243
2	1.56824	20.5	54J	552887	6494243
2.5	2.12174	22.2	54J	553365	6494105
3.1	2.62911	29.7	54J	553365	6494105
3.3	2.30624	24.4	54J	553365	6494105
3.5	1.93724	22.1	54J	553365	6494105
2.8	1.70662	25.7	54J	553365	6494105
3.1	1.98336	21.7	54J	553365	6494105
2.6	2.30624	20.9	54J	553365	6494105
2.8	2.44461	23.5	54J	553365	6494105
3	1.66049	17.9	54J	553365	6494105
2.9	3.13648	18	54J	553365	6494105
2.6	3.87448	19.1	54J	553365	6494105
3.3	3.32098	20.1	54J	552292	6494091
2.7	3.04423	22.7	54J	552292	6494091
2.5	3.73611	31.5	54J	552292	6494091
2.4	3.32098	32	54J	552292	6494091
2.1	3.55161	30.4	54J	552292	6494091
3	4.38185	23.7	54J	552237	6494094
3	4.15123	23	54J	552237	6494094
2.1	2.12174	16.1	54J	552237	6494094
3.5	2.99811	30.6	54J	552237	6494094
4.2	4.2896	33.1	54J	552181	6494088
3.5	3.59773	25.8	54J	552181	6494088
3.6	3.64386	22.9	54J	552181	6494088
4.8	5.7656	31.6	54J	552181	6494088
2.9	2.53686	22	54J	552181	6494088
4.4	3.13648	33.3	54J	552107	6494084
3.9	5.11985	24.2	54J	552107	6494085
4.4	2.49074	23.6	54J	552107	6494086
4.6	2.58299	33.5	54J	552107	6494087
1.8	1.42987	18.7	54J	553537	6494103
1.9	2.81361	20.3	54J	553537	6494103
1.6	2.07561	21.7	54J	553537	6494103
2	1.70662	16.6	54J	553537	6494103
2.7	2.12174	20.7	54J	553537	6494103
1.1	1.24537	8.3	54J	553490	6494814
0.8	1.10699	8.4	54J	553490	6494814
0.8	1.66049	9.3	54J	553475	6494767
0.5	1.10699	5.5	54J	553475	6494767
2.3	1.06087	15.9	54J	553397	6494724
2.2	1.19924	26.4	54J	553397	6494724
4	2.16786	24.1	54J	553319	6494711
3.7	2.95198	29.3	54J	553319	6494711
2.8	2.44461	22.2	54J	553319	6494711
3	2.02949	22.6	54J	553319	6494711
2.9	2.16786	30.6	54J	553319	6494711
2.1	1.84499	21.4	54J	553319	6494711
3.4	1.47599	23.9	54J	553263	6494297
3	1.52212	29	54J	553263	6494297
3.2	2.12174	23.7	54J	553263	6494297
3.3	1.79887	28.5	54J	553263	6494297
3.1	1.75274	23.7	54J	553263	6494297
3.2	1.89112	23.4	54J	553263	6494297
4.2	2.85974	29.9	54J	553263	6494297
3.8	2.90586	29	54J	553263	6494297
2.1	1.61437	19.2	54J	553219	6494539
3.4	2.07561	26.3	54J	553219	6494539
3.1	2.26011	25	54J	553219	6494539
3.4	2.58299	22.5	54J	553219	6494539
3.8	1.75274	30.5	54J	553167	6494321
3.8	1.84499	31.3	54J	553167	6494321
2.4	1.52212	15.6	54J	553167	6494321
4.1	2.58299	31.5	54J	553167	6494321
3.9	2.62911	24.1	54J	553128	6494284
2.9	1.61437	24.9	54J	553128	6494284
2.9	2.49074	23.6	54J	553128	6494284
4.1	1.93724	22.8	54J	553128	6494284
2.8	1.70662	22.8	54J	553128	6494284
3.9	1.75274	28.1	54J	552967	6494232
1.6	1.61437	15.2	54J	552967	6494232
3.9	2.58299	24.3	54J	552967	6494232
4.7	2.76749	34.2	54J	552967	6494232
4.8	2.58299	33	54J	552967	6494232
3.7	1.61437	27.7	54J	552926	6494226
3.8	1.42987	29	54J	552926	6494226
3.2	1.66049	22.6	54J	552926	6494226
3.3	1.79887	23.4	54J	552926	6494226
3.6	1.42987	20.1	54J	552926	6494226
3.3	2.62911	21.3	54J	552887	6494243
2.3	1.75274	21.2	54J	552887	6494243
2.4	1.38374	24.1	54J	552887	6494243
2.1	1.70662	16.4	54J	552887	6494243
2	2.07561	19.9	54J	552887	6494243
3.2	1.75274	28.6	54J	552887	6494243
2.9	2.62911	25.3	54J	553365	6494105
3.3	2.44461	27.2	54J	553365	6494105
3.2	2.81361	22.9	54J	553365	6494105
2.9	2.30624	20.1	54J	553365	6494105
3	2.07561	24.5	54J	553365	6494105
2.4	1.89112	20.6	54J	553365	6494105
2.9	1.84499	26.5	54J	553365	6494105
3	2.26011	25.9	54J	553365	6494105
2.8	1.89112	24.5	54J	553365	6494105
2.7	2.44461	22.2	54J	553365	6494105
2.2	2.35236	17.9	54J	553365	6494105
2.9	1.66049	19.3	54J	553365	6494105
2.8	2.53686	20.1	54J	553365	6494105
2.9	5.0276	24.7	54J	553365	6494105
3.1	5.16597	22.5	54J	553365	6494105
3.3	6.22684	21.7	54J	552292	6494091
3.1	5.62722	21.9	54J	552292	6494091
2.8	4.88922	21.3	54J	552292	6494091
2.6	3.27486	27.4	54J	552292	6494091
2.6	3.36711	22.3	54J	552237	6494094
3.8	2.90586	29.5	54J	552237	6494094
2.4	2.02949	27.1	54J	552237	6494094
4.3	4.8431	32.5	54J	552181	6494088
4.3	4.38185	30.7	54J	552181	6494088
3.8	2.49074	31.7	54J	552181	6494088
4.2	2.30624	32	54J	552181	6494088
4.8	2.81361	31.7	54J	552107	6494084
3.9	2.85974	27.8	54J	552107	6494084
4	2.02949	28.8	54J	552107	6494084
4.5	2.99811	33.2	54J	552107	6494084
4.1	3.18261	35.3	54J	552107	6494084
3.40887	7.37477	26.122	54J	553537	6494601
3.25259	8.56425	21.6391	54J	553537	6494601
2.01211	4.75791	18.1906	54J	553537	6494601
2.04141	4.99581	29.3119	54J	553537	6494601
1.49443	5.7095	17.8458	54J	553537	6494601
3.94608	4.28212	20.1735	54J	553490	6494814
0.7521	5.23371	5.86237	54J	553490	6494814
3.0377	2.85475	21.208	54J	553490	6494814
3.3991	11.1811	32.0706	54J	553490	6494814
1.76792	8.80214	15.4318	54J	553475	6494767
2.75444	7.85056	18.6217	54J	553475	6494767
2.11955	3.33054	22.3287	54J	553397	6494724
2.26607	7.61266	16.3802	54J	553397	6494724
3.61399	4.04423	22.9322	54J	553397	6494724
3.51631	8.56425	25.9496	54J	553319	6494711
2.79351	2.85475	21.2942	54J	553319	6494712
3.06701	8.08846	25.4323	54J	553319	6494713
2.92049	7.61266	23.4495	54J	553319	6494714
6.11	1.94647	32.47	54J	550627	6494129
5.68	5.26745	28.33	54J	550810	6494217
5.48	7.14473	24.1	54J	550870	6494253
3.12	2.91509	13.85	54J	550979	6494289
4.89	3.39478	24.71	54J	551035	6494305
5.09	1.5544	25.09	54J	551200	6494284
5.57	2.41694	27.9	54J	551345	6494211
5.84	1.94647	35.48	54J	551429	6494230
6.13	3.54238	33.27	54J	551619	6494342
4.88	1.63743	25.36	54J	551661	6494230
2.54	1.75735	14.14	54J	551805	6494099
2.6	0.797958	14.44	54J	551833	6494110
3.85	1.93263	21.01	54J	551914	6494142
5.26	1.32378	26.12	54J	551961	6494162
6.36	3.22412	32.8	54J	551995	6494192
6.71	2.06178	38.69	54J	552082	6494199
5.43	2.59221	27.37	54J	552155	6494194
4.53	2.80439	24.5	54J	552203	6494216
4.15	4.01285	20.56	54J	552681	6494339
4.51	2.82745	14.22	54J	552717	6494344
4.18	1.56824	21.61	54J	552758	6494349
4.48	1.96491	20.03	54J	552831	6494360
3.33	0.848696	20.2	54J	552880	6494360
4.6	1.08393	22.59	54J	552934	6494333
4.76	1.30994	23.27	54J	553069	6494331
4.25	2.64756	19.55	54J	553133	6494360
4.08	1.05626	23.56	54J	553210	6494392
4.89	2.09868	24.87	54J	553261	6494428
4.51	1.21308	23.25	54J	553313	6494436
3.48	1.45293	20.53	54J	553358	6494454
3.73	1.78964	20.51	54J	553456	6494489
3.8	2.58299	27.7	54J	549308	6467198
4.2	2.53686	30.6	54J	549308	6467198
4.1	3.55161	29.5	54J	549308	6467198
4.9	3.50548	34.9	54J	549308	6467198
3.7	2.44461	27.1	54J	549287	6467238
3.7	2.02949	26.8	54J	549287	6467238
4	2.58299	26.3	54J	549258	6467245
5	2.58299	27.9	54J	549258	6467245
3.8	2.81361	30.1	54J	549258	6467245
2.9	2.53686	29.3	54J	549177	6467197
3.2	2.58299	31	54J	549177	6467197
3.1	2.44461	29.6	54J	549177	6467197
2.8	2.85974	28.6	54J	549177	6467197
3.4	2.26011	28.5	54J	549177	6467197
3.2	2.44461	30	54J	549131	6467186
3	2.35236	26.7	54J	549131	6467186
3.4	3.22873	35.4	54J	549119	6467226
3.7	3.87448	44	54J	549119	6467226
2.6	2.62911	33.8	54J	549119	6467226
3.4	2.21399	39.6	54J	549119	6467226
2.9	2.39849	31.7	54J	549119	6467226
2.9	2.90586	33.9	54J	549129	6467312
3	2.21399	32.5	54J	549129	6467312
3.1	2.76749	31.6	54J	549129	6467312
3.5	2.85974	41.6	54J	549129	6467312
2.6	2.30624	32.3	54J	549167	6467320
3.4	2.49074	32.9	54J	549167	6467320
3.3	2.72136	36.7	54J	549167	6467320
3.5	2.58299	39.1	54J	549167	6467320
3.2	2.53686	30.4	54J	549167	6467320
3.3	2.76749	31.2	54J	549167	6467320
4	2.85974	32.4	54J	549167	6467320
3.5	1.75274	34.6	54J	549195	6467309
3	2.16786	33.3	54J	549195	6467309
3	2.30624	23.8	54J	549195	6467309
3.1	2.44461	30	54J	549195	6467309
3	3.45936	33.1	54J	549081	6467291
3.2	2.44461	37.1	54J	549081	6467291
4	2.67524	37.7	54J	549081	6467291
3.1	3.55161	34.2	54J	549081	6467291
2.5	2.21399	29.5	54J	549081	6467291
3	2.95198	34	54J	549081	6467291
3	2.62911	32.2	54J	549081	6467291
4	3.68998	41	54J	549081	6467291
4.9	4.33573	45	54J	549081	6467291
3.2	3.41323	34.8	54J	549081	6467291
3.2	3.36711	38.2	54J	549044	6467295
4.1	2.30624	44.9	54J	549044	6467295
3.2	2.67524	30.8	54J	549044	6467295
3.2	2.35236	34.6	54J	549044	6467295
3.2	2.44461	34.9	54J	549044	6467295
3.4	2.95198	36.1	54J	549044	6467295
3.7	2.76749	38.5	54J	549044	6467295
3.9	3.27486	38.5	54J	549044	6467295
3.7	2.30624	35.9	54J	549044	6467295
3.6	2.67524	35.8	54J	549044	6467295
4	4.15123	42.1	54J	549044	6467295
3.5	3.78223	41.1	54J	549044	6467295
3.4	3.04423	31.2	54J	549044	6467295
3.5	2.12174	32	54J	549044	6467295
3.8	2.67524	25.6	54J	549044	6467295
3.3	2.76749	32.5	54J	549099	6467352
2.9	2.76749	35.5	54J	549099	6467352
2	2.35236	32.7	54J	549099	6467352
2.9	2.30624	30.9	54J	549099	6467352
3.4	2.67524	43.4	54J	549099	6467352
2.9	2.39849	34	54J	549099	6467352
2.9	2.62911	35.4	54J	549099	6467352
2.8	3.78223	39.7	54J	549099	6467352
3.1	2.16786	37.6	54J	549099	6467352
3	2.76749	39	54J	549099	6467352
2.8	2.44461	28.6	54J	549099	6467352
3.2	3.32098	35.3	54J	549150	6467552
3.8	2.49074	28.2	54J	549150	6467552
3.9	2.67524	30.9	54J	549150	6467552
4.3	2.95198	33.2	54J	549150	6467552
3.3	3.22873	37.4	54J	549150	6467552
3	3.22873	31.3	54J	549150	6467552
3.5	2.99811	32.4	54J	549150	6467552
3.4	2.07561	26.8	54J	555462	6469364
4.1	3.32098	34.1	54J	555462	6469364
4.2	2.26011	31.6	54J	555462	6469364
3.2	2.21399	26	54J	555516	6469400
4	2.26011	26.7	54J	555516	6469400
3.6	2.72136	23.3	54J	555516	6469400
3.8	2.44461	24	54J	555516	6469400
3.6	2.30624	27	54J	555516	6469400
5	3.09036	36.6	54J	555516	6469400
4.6	2.90586	27.3	54J	555547	6469076
5.8	3.64386	38.6	54J	555547	6469076
4.1	1.79887	29.5	54J	555610	6469248
4.2	2.07561	28.4	54J	555610	6469248
4.5	2.26011	29.2	54J	555610	6469248
4.9	2.62911	33.8	54J	555610	6469248
4.3	2.81361	29.1	54J	555610	6469248
4.6	2.30624	33.9	54J	555610	6469248
4.2	3.13648	31.4	54J	555610	6469248
4.7	2.85974	5.2	54J	555610	6469248
3.6	2.07561	24.9	54J	555610	6469248
4.2	3.36711	33.4	54J	555593	6469216
4.7	4.05898	45.5	54J	555593	6469216
3.2	2.62911	27.7	54J	555593	6469216
1.6	1.66049	24.3	54J	555593	6469216
4	2.58299	36.4	54J	555593	6469216
3.1	2.85974	39.6	54J	555625	6469175
5.4	2.16786	37.2	54J	555625	6469175
4.6	1.79887	28.6	54J	555625	6469175
3.4	2.49074	26	54J	555625	6469175
3.8	2.16786	26.7	54J	555625	6469175
4.6	2.62911	25.2	54J	555625	6469175
6.1	3.68998	37.2	54J	555625	6469175
4.2	2.85974	27.85	54J	555625	6469175
4	2.81361	26.6	54J	555625	6469175
4.2	2.67524	32.5	54J	549308	6467198
4.4	2.53686	34	54J	549308	6467198
3.4	1.98336	35	54J	549287	6467238
3.8	2.16786	29.9	54J	549287	6467238
3.1	2.39849	27.7	54J	549258	6467245
4.8	2.35236	25.3	54J	549258	6467245
3.6	2.72136	30.5	54J	549177	6467197
2.7	2.35236	25.1	54J	549177	6467197
3.8	2.21399	35	54J	549177	6467197
5.4	2.72136	28.7	54J	549177	6467197
3.5	2.62911	33.4	54J	549131	6467186
3.5	2.16786	28.4	54J	549131	6467186
3.1	2.58299	29.8	54J	549119	6467226
3.1	2.26011	34.4	54J	549119	6467226
2.9	2.16786	33.4	54J	549119	6467226
2.8	2.12174	30	54J	549119	6467226
2.5	0.922495	8	54J	549129	6467312
2.6	2.12174	32.4	54J	549129	6467312
2.8	2.39849	29.5	54J	549129	6467312
2.9	2.85974	33.4	54J	549129	6467312
2.8	2.16786	36.5	54J	549167	6467320
3.4	2.07561	41	54J	549167	6467320
2.7	1.66049	36.5	54J	549167	6467320
2.7	1.84499	32.1	54J	549167	6467320
2.8	2.39849	32.6	54J	549167	6467320
3.1	2.62911	33.9	54J	549167	6467320
3.2	2.90586	38.6	54J	549167	6467320
3.1	2.44461	32.2	54J	549167	6467320
3.6	2.49074	36.3	54J	549195	6467309
3.3	2.30624	34.9	54J	549195	6467309
3.3	2.67524	37.1	54J	549195	6467309
3.2	2.49074	32.8	54J	549081	6467291
2.7	2.90586	37.2	54J	549081	6467291
3.4	2.95198	35.4	54J	549081	6467291
2.9	2.39849	28	54J	549081	6467291
2.9	2.39849	40.2	54J	549081	6467291
3.5	2.81361	36	54J	549081	6467291
2.8	2.39849	34.9	54J	549081	6467291
3.2	2.53686	35	54J	549081	6467291
3	2.81361	40.8	54J	549081	6467291
3.2	2.35236	32.3	54J	549044	6467295
2.8	2.72136	37.7	54J	549044	6467295
3.4	2.49074	34.6	54J	549044	6467295
3.3	1.52212	40.8	54J	549044	6467295
3.5	3.04423	32.4	54J	549044	6467295
3.4	2.85974	38.9	54J	549044	6467295
3.1	2.72136	38.7	54J	549044	6467295
3.2	2.49074	34.5	54J	549044	6467295
3.1	2.58299	32	54J	549044	6467295
2.8	1.79887	31.3	54J	549044	6467295
3.5	2.12174	38.7	54J	549044	6467295
3	1.98336	37.5	54J	549044	6467295
3.4	2.44461	37.6	54J	549044	6467295
3.5	2.76749	33.7	54J	549044	6467295
3.4	2.85974	40.1	54J	549044	6467295
3.4	2.85974	35.7	54J	549044	6467295
2.6	3.13648	31	54J	549099	6467352
3.3	2.07561	37	54J	549099	6467352
3.1	2.72136	38	54J	549099	6467352
2.9	2.58299	36.6	54J	549099	6467352
2.8	2.53686	35.3	54J	549099	6467352
2.8	2.72136	36.3	54J	549099	6467352
2.8	2.16786	35.5	54J	549099	6467352
2.7	2.62911	36.3	54J	549099	6467352
3	2.49074	31.6	54J	549099	6467352
3.1	2.02949	39.8	54J	549099	6467352
2.9	1.84499	34.7	54J	549099	6467352
3.4	2.90586	45.7	54J	549150	6467552
1.8	2.12174	25.3	54J	549150	6467552
3.5	2.30624	34.4	54J	549150	6467552
3.3	2.30624	28.5	54J	549150	6467552
3.6	2.49074	32.5	54J	549150	6467552
3.5	2.07561	34.7	54J	549150	6467552
3.3	2.02949	33	54J	549150	6467552
3.5	2.39849	33.1	54J	549150	6467552
2.9	4.56635	49.9	54J	549150	6467552
3.4	2.02949	27	54J	555462	6469364
3.2	1.66049	30.6	54J	555462	6469364
3	2.58299	29.9	54J	555462	6469364
3.1	2.35236	22.4	54J	555516	6469400
3.3	2.35236	24.4	54J	555516	6469400
2.9	1.61437	18.2	54J	555516	6469400
4	2.26011	29.7	54J	555516	6469400
4.9	2.26011	36.9	54J	555516	6469400
4.7	2.02949	38.2	54J	555516	6469400
4.5	1.89112	32.3	54J	555516	6469400
4.2	1.93724	38.6	54J	555516	6469400
3.9	2.49074	36.4	54J	555516	6469400
4	2.26011	30.3	54J	555547	6469076
4.6	2.16786	37.8	54J	555610	6469248
4.5	1.98336	31.8	54J	555610	6469248
5.4	2.12174	33.5	54J	555610	6469248
4.8	1.98336	27.1	54J	555610	6469248
4.2	1.75274	28.8	54J	555610	6469248
3.4	1.79887	29.1	54J	555610	6469248
4.5	1.84499	35.2	54J	555610	6469248
4.9	2.49074	32.7	54J	555610	6469248
3.1	2.07561	25.7	54J	555593	6469216
3.8	2.58299	32.3	54J	555593	6469216
3.7	1.79887	33.3	54J	555593	6469216
1.9	1.93724	32.3	54J	555593	6469216
1.4	1.42987	27.8	54J	555593	6469216
2.1	1.47599	24.5	54J	555593	6469216
2.8	3.04423	32.5	54J	555593	6469216
4.7	2.76749	37	54J	555593	6469216
2.6	1.93724	26.4	54J	555593	6469216
2.5	1.61437	25.5	54J	555625	6469175
4.5	1.33762	28.2	54J	555625	6469175
4.1	2.53686	29.2	54J	555625	6469175
4.4	2.44461	34.2	54J	555625	6469175
3.5	2.30624	29	54J	555625	6469175
4.4	2.58299	29.5	54J	555625	6469175
3.5	2.99811	32.2	54J	555625	6469175
5.2	2.62911	34.2	54J	555625	6469175
4	1.56824	19.5	54J	555625	6469175
4.2	1.98336	26.1	54J	555625	6469175
3.8	2.30624	24.2	54J	555625	6469175
4.6	2.16786	28	54J	555625	6469175
4.2	2.16786	30.7	54J	555625	6469175
4.8	2.81361	29.3	54J	555625	6469175
4.5	1.98336	29.6	54J	555625	6469175
5.3	2.30624	35.5	54J	555625	6469175
3.8	2.39849	25.3	54J	555625	6469175
4.9	1.93724	32.1	54J	555625	6469175
3.9	2.90586	28	54J	555625	6469175
4.05	2.3	33.2	54J	549308	6467198
4.8	1.9	38.4	54J	549311	6467221
4.35	2.3	35.5	54J	549287	6467238
2.69	1.5	34	54J	549287	6467238
4.22	0	34.1	54J	549258	6467245
3.72	2.1	29.6	54J	549258	6467245
3.9	2.6	32.8	54J	549177	6467197
3.92	2	36.7	54J	549177	6467197
3.91	1.5	36.7	54J	549177	6467197
3.63	1.9	39.9	54J	549177	6467197
3.66	3.2	34.8	54J	549131	6467186
3.55	2.2	36.2	54J	549131	6467186
3.23	2.47	39.2	54J	549119	6467226
3.41	1.4	38.4	54J	549119	6467226
3.73	4.8	41.6	54J	549119	6467226
3.51	3.9	42.9	54J	549119	6467226
3.33	3	38.6	54J	549129	6467312
2.71	3	37.2	54J	549129	6467312
3.02	3.8	37.6	54J	549129	6467312
3.4	0	33	54J	549167	6467320
3.26	1.7	40.4	54J	549167	6467320
3.33	2.6	45.5	54J	549167	6467320
3.71	2.1	42.1	54J	549167	6467320
3.28	2.4	41	54J	549167	6467320
3.82	2.2	41.7	54J	549167	6467320
3.54	1.6	38.9	54J	549195	6467309
2.94	2.6	36.3	54J	549195	6467309
3.6	1.8	37.3	54J	549195	6467309
2.86	2.5	38.6	54J	549081	6467291
3.13	2.4	41.3	54J	549081	6467291
3.73	2.7	48.8	54J	549081	6467291
3.22	2.1	44.2	54J	549081	6467291
3.02	3.1	35.6	54J	549081	6467291
4.78	1.5	56.6	54J	549081	6467291
3.37	2.1	44.7	54J	549081	6467291
3.25	2.5	45.8	54J	549081	6467291
3.05	3	40.1	54J	549044	6467295
3.24	3.4	35.1	54J	549044	6467295
3.18	3.1	37.2	54J	549044	6467295
3.37	2.9	36.6	54J	549044	6467295
3.1	1.25	31.5	54J	549044	6467295
3.12	1.8	36.5	54J	549044	6467295
2.8	2.1	37.7	54J	549044	6467295
3.77	1.3	40.9	54J	549044	6467295
4.12	2.6	44.5	54J	549044	6467295
3.43	1.1	38.8	54J	549044	6467295
3.28	3.1	38.8	54J	549044	6467295
3.69	2.2	43.1	54J	549044	6467295
4.15	2.1	39.3	54J	549044	6467295
3.63	3.1	39.7	54J	549044	6467295
2.98	2	40.5	54J	549099	6467352
3.08	2.8	39.9	54J	549099	6467352
3.31	2.9	45.5	54J	549099	6467352
3.41	1	35.9	54J	549099	6467352
3.48	4	36.7	54J	549099	6467352
3.51	3	40.7	54J	549099	6467352
3.12	2.6	36.7	54J	549099	6467352
2.5	1.7	29.7	54J	549150	6467552
3.45	3.6	36.6	54J	549150	6467552
4.44	3.7	44.5	54J	549150	6467552
3.67	3.1	38.2	54J	549150	6467552
3.82	2.7	36.3	54J	549150	6467552
3.5	2.9	39.4	54J	549150	6467552
4.37	3.3	41.4	54J	549150	6467552
3.12	2.5	42.6	54J	549150	6467552
3.12	2.5	42.6	54J	549150	6467552
3.47	3.2	41.9	54J	549150	6467552
3.8	5.4	65.8	54J	549150	6467552
3.69	4	51.5	54J	549150	6467552
4.12	0	36.6	54J	555462	6469364
3.74	1.4	33.9	54J	555462	6469364
2.86	0	28.9	54J	555462	6469364
3.74	0	32.9	54J	555462	6469364
3.23	2.6	40.6	54J	555516	6469400
3.57	1.6	30.3	54J	555516	6469400
4.6	2	33.9	54J	555516	6469400
3.45	0	28.19	54J	555516	6469400
3.82	1.5	30.8	54J	555516	6469400
5.52	3.3	39	54J	555547	6469076
4.6	2.5	38.1	54J	555547	6469076
4.54	1.1	39.2	54J	555547	6469076
4.62	2.5	33.8	54J	555610	6469248
4.79	1.9	38.5	54J	555610	6469248
4.43	1.8	36.6	54J	555610	6469248
4.92	2.4	33.7	54J	555610	6469248
4.22	2.5	36.9	54J	555610	6469248
4.33	2	37	54J	555610	6469248
5.21	5.4	41.4	54J	555610	6469248
4.25	2	33.5	54J	555610	6469248
4	1.2	36.6	54J	555593	6469216
4.34	4	31	54J	555593	6469216
3.5	1.8	34.3	54J	555593	6469216
4.3	4	40.6	54J	555593	6469216
5.31	2.8	48.8	54J	555593	6469216
4.2	1.1	33.7	54J	555625	6469175
3.74	2.4	29.9	54J	555625	6469175
2.71	1.4	26.5	54J	555625	6469175
4.57	2.7	32.7	54J	555625	6469175
4.61	2.2	34.1	54J	555625	6469175
4.4	2.6	33.3	54J	555625	6469175
4.77	1.1	30.7	54J	555625	6469175
3.98	3	33.4	54J	555625	6469175
5.02	2.9	32.2	54J	555625	6469175
3.69	3.1	27.7	54J	555701	6469044
3.88	2.7	29.1	54J	555701	6469044
4.33	1.1	29.7	54J	555701	6469044
4.96	2	33.1	54J	555701	6469044
3.53	1.7	26.2	54J	555701	6469044
4.25	1.1	31.1	54J	555701	6469044
5.08	1.4	31.8	54J	555701	6469044
4.63	1.3	30.3	54J	555701	6469044
4.82	1.7	32.3	54J	555701	6469044
5.51	1.7	36.5	54J	555701	6469044
3.19	1.03319	18.58	54J	549308	6467198
4.61	1.04703	21.83	54J	549308	6467198
3.75	0.691871	25.02	54J	549287	6467238
5.02	1.10699	29.1	54J	549287	6467238
4.73	1.66972	31.76	54J	549287	6467238
5.34	2.73059	33.04	54J	549258	6467245
5.33	1.57747	32.62	54J	549258	6467245
4.97	1.5913	30.83	54J	549258	6467245
4.64	1.43448	30.86	54J	549177	6467197
5.28	1.9603	33.19	54J	549177	6467197
4.79	1.68817	29.29	54J	549177	6467197
4.68	1.52673	27.7	54J	549131	6467186
4.99	1.49905	28.35	54J	549131	6467186
3.76	0.936333	21.01	54J	549119	6467226
5.46	1.75735	28.35	54J	549129	6467312
5.14	1.96491	36.91	54J	549129	6467312
4.45	1.65588	26.38	54J	549167	6467320
4.79	2.04794	29.18	54J	549167	6467320
4.88	1.89573	32.34	54J	549195	6467309
4.7	1.13928	29.74	54J	549195	6467309
5.4	2.26934	41.43	54J	549195	6467309
4.55	1.57285	34.2	54J	549081	6467291
4.21	1.13006	31.46	54J	549081	6467291
4.61	1.50828	34.39	54J	549081	6467291
5.56	1.84038	37.37	54J	549081	6467291
5.24	1.9972	36.84	54J	549044	6467295
5.08	2.00643	36.5	54J	549044	6467295
4.7	1.51289	32.44	54J	549044	6467295
4.28	1.56824	28.46	54J	549044	6467295
5.8	2.02949	38.03	54J	549099	6467352
4.47	1.54518	27.61	54J	549099	6467352
4.58	1.66049	26.75	54J	549099	6467352
4.58	1.46216	29.68	54J	549099	6467352
4.8	1.47138	31.8	54J	549099	6467352
5.1	1.64204	30.42	54J	549099	6467352
5.37	1.95569	34.27	54J	549099	6467352
5.16	1.87728	30.82	54J	549099	6467352
3.36	1.10238	21.06	54J	549150	6467552
4.61	1.42987	29.78	54J	549150	6467552

## Sheet: Ivrea Verbano
Ivrea GRS Data
K (wt%)	U (ppm)	Th (ppm)	UTM Zone	Easting	Northing
3.6	1.93724	18.3	32T	452335	5082612
3.5	2.67524	19.5	32T	452335	5082612
3.8	2.30624	22.5	32T	452335	5082612
3.5	2.49074	19.2	32T	452335	5082612
3.9	2.49074	24.8	32T	452335	5082612
4	2.67524	23.5	32T	452335	5082612
4.4	2.39849	24.7	32T	452335	5082612
3.9	2.67524	21.6	32T	452335	5082612
4.2	2.49074	23.5	32T	452335	5082612
4.2	2.95198	23.4	32T	452335	5082612
2.1	1.24537	13.2	32T	452284	5082700
3.6	1.66049	9.4	32T	452284	5082700
5	2.30624	15.7	32T	452284	5082700
2.9	1.33762	9.8	32T	452284	5082700
4	1.98336	9.2	32T	452253	5082727
4	2.99811	19	32T	452253	5082727
3	2.16786	17.8	32T	452253	5082727
3.1	2.39849	15.9	32T	452253	5082727
4.1	2.76749	18.3	32T	452253	5082727
4.1	2.76749	19.2	32T	452253	5082727
2.8	2.49074	17.4	32T	452253	5082727
1.8	3.04423	19	32T	449390	5084067
1.9	1.79887	17.9	32T	449390	5084067
2.4	2.62911	25.7	32T	449390	5084067
2.8	2.95198	25.2	32T	449390	5084067
3.5	2.21399	23.5	32T	449390	5084067
2.9	2.81361	21.6	32T	449812	5083630
4.3	3.32098	28.1	32T	449812	5083630
4.3	4.88922	27.3	32T	449812	5083630
3.3	3.73611	28.9	32T	449812	5083630
4.2	3.27486	25.1	32T	449812	5083630
4.3	2.85974	31.4	32T	449812	5083630
2.4	3.18261	25.8	32T	449812	5083630
4.1	2.58299	20.4	32T	450095	5083631
3.1	1.89112	23.9	32T	450113	5083627
3.7	2.35236	21.6	32T	450804	5083388
3.8	2.26011	16.3	32T	450804	5083388
4.4	2.35236	24	32T	450804	5083388
2.5	2.49074	16.1	32T	450804	5083388
3.5	1.89112	22.7	32T	450804	5083388
3.6	2.44461	21.2	32T	450804	5083388
3.8	2.30624	20.6	32T	450804	5083388
3.5	2.49074	19.6	32T	450804	5083388
3.3	2.58299	19.6	32T	450804	5083388
3.9	2.67524	22.1	32T	450804	5083388
3.2	2.62911	21.2	32T	450804	5083388
4.2	2.26011	16.2	32T	450804	5083388
2.7	2.02949	18.6	32T	450804	5083388
3	2.58299	1.76	32T	451834	5083247
4.2	2.81361	14.8	32T	451834	5083247
3.6	1.93724	15.7	32T	451834	5083247
3.4	3.22873	23.9	32T	451834	5083247
3	1.98336	13.3	32T	451834	5083247
2.5	2.49074	17.6	32T	451834	5083247
3.3	2.26011	22.6	32T	451834	5083247
3.1	2.39849	19.1	32T	451834	5083247
3.9	1.93724	22.5	32T	452131	5082826
3.3	1.98336	20.5	32T	452131	5082826
2.9	2.49074	17.4	32T	452131	5082826
3.5	2.39849	15.3	32T	452131	5082826
3.8	3.18261	17.4	32T	452131	5082826
3.4	3.22873	17.3	32T	452131	5082826
3.1	2.33391	16	32T	452131	5082826
4.3	2.62911	18.4	32T	452131	5082826
4.2	2.12174	18.5	32T	452131	5082826
3.7	2.85974	20.4	32T	452131	5082826
3.1	2.44461	13.7	32T	452167	5082799
3.6	1.89112	19	32T	452167	5082799
3	1.75274	15.4	32T	452167	5082799
3.2	1.93724	19.3	32T	452167	5082799
3.4	2.12174	20.4	32T	452167	5082799
3.3	1.84499	21.9	32T	452167	5082799
3.1	2.30624	17.4	32T	452152	5082820
3.1	2.58299	17.2	32T	452152	5082820
3.4	2.85974	15.6	32T	452152	5082820
3.6	2.81361	18.2	32T	452152	5082820
4.3	3.59773	20.4	32T	452152	5082820
3.5	2.58299	22.7	32T	452152	5082820
4	2.67524	18.2	32T	452152	5082820
3.5	2.26011	19.1	32T	452144	5082841
3.1	2.21399	20.6	32T	452144	5082841
3	2.07561	18.7	32T	452144	5082841
3.2	2.21399	19	32T	452144	5082841
3.9	2.35236	19.3	32T	452144	5082841
2.6	2.35236	17.6	32T	452122	5082924
2.5	1.98336	14.9	32T	452122	5082924
4.5	3.04423	21.9	32T	451959	5083053
4.6	3.09036	26.2	32T	451959	5083053
3.8	2.62911	22.9	32T	451959	5083053
5.3	2.53686	28	32T	451959	5083053
3.3	2.81361	21.9	32T	451959	5083053
4.1	2.44461	17.5	32T	451922	5083058
3.7	2.39849	20.8	32T	451922	5083058
3	2.02949	17.4	32T	451922	5083058
3.1	1.98336	14.2	32T	451388	5083107
3.2	2.53686	16.6	32T	451388	5083107
4.1	2.02949	19.5	32T	451388	5083107
4.1	2.02949	19	32T	451388	5083107
3.6	2.39849	22	32T	451388	5083107
4	2.44461	20.5	32T	451388	5083107
3.9	2.49074	24.8	32T	451307	5083783
4	2.67524	23.5	32T	451307	5083783
4.4	2.39849	24.7	32T	451307	5083783
3.9	2.67524	21.6	32T	451307	5083783
4.2	2.49074	23.5	32T	451307	5083783
4.2	2.95198	23.4	32T	451307	5083783
2.3	1.33762	28.3	32T	445036	5086767
2	1.47599	20.5	32T	445036	5086767
2.4	1.52212	30.5	32T	445036	5086767
1.9	1.24537	26.2	32T	445036	5086767
1.7	1.33762	22.8	32T	445036	5086767
2.9	1.89112	32.7	32T	445036	5086767
2.5	1.24537	25.5	32T	445036	5086767
2.6	1.61437	27.3	32T	445036	5086767
2.2	1.42987	22.5	32T	445036	5086767
3.2	2.07561	25.4	32T	445036	5086767
2.4	1.56824	21	32T	445036	5086767
3.1	1.10699	20.1	32T	445036	5086767
2.5	1.10699	18	32T	445036	5086767
3.5	1.52212	21	32T	445036	5086767
2.9	2.26011	21.9	32T	445036	5086767
2.6	2.21399	20.5	32T	445036	5086767
1.8	1.01474	8.6	32T	445036	5086767
3.3	1.79887	21.3	32T	445208	5086040
2.8	1.61437	25.6	32T	445208	5086040
3	1.66049	18.6	32T	445208	5086040
2.7	1.38374	22.5	32T	445264	5085802
3.4	1.10699	17.2	32T	445264	5085802
3.8	1.33762	15.7	32T	445264	5085802
2.8	1.33762	24.2	32T	445264	5085802
2.8	1.75274	21.9	32T	445264	5085802
2.8	1.98336	24.5	32T	445264	5085802
2.4	1.75274	24.5	32T	445264	5085802
3.4	1.33762	27.1	32T	445264	5085802
1.9	1.24537	16.4	32T	445294	5085638
1.8	1.66049	15.5	32T	445294	5085638
2.4	1.70662	19.6	32T	445294	5085638
2.7	1.79887	23.2	32T	445294	5085638
2.6	2.21399	27.2	32T	445294	5085638
2.7	1.66049	24.3	32T	445294	5085638
3.1	1.56824	18.4	32T	445294	5085638
2.8	1.61437	18.2	32T	445294	5085638
2.2	1.61437	14.6	32T	445294	5085638
2.8	1.42987	17	32T	445294	5085638
3.3	1.89112	25.4	32T	445294	5085638
3.5	2.02949	27	32T	445294	5085638
3.7	1.66049	25.5	32T	445294	5085638
4.2	1.75274	24.1	32T	445294	5085638
3.2	1.66049	29.9	32T	445294	5085638
2.9	2.12174	24.7	32T	445487	5085282
3.4	2.07561	21.3	32T	445487	5085282
4.2	1.98336	26.9	32T	445487	5085282
3	1.38374	21.9	32T	445743	5085064
3.1	1.42987	19.5	32T	445743	5085064
3.2	1.47599	22.8	32T	445743	5085064
3.1	1.42987	21.5	32T	445743	5085064
1.7	1.42987	38.8	32T	445065	5086884
1.6	1.01474	22.1	32T	445065	5086884
2.5	1.24537	19.6	32T	445065	5086884
2	0.784121	20	32T	445065	5086884
3.4	1.10699	27.1	32T	445065	5086884
2.5	1.84499	26.4	32T	443395	5087136
3.6	1.29149	30.2	32T	443395	5087136
4.3	1.75274	31.9	32T	443395	5087136
2.3	1.70662	26.4	32T	443395	5087136
3	1.56824	28.4	32T	443395	5087136
3.6	1.47599	29.1	32T	443395	5087136
2.2	1.24537	13	32T	443395	5087136
3.7	1.47599	24.3	32T	443395	5087136
3.8	1.19924	25.7	32T	443395	5087136
3.5	1.70662	30.3	32T	443395	5087136
2.6	1.01474	22.1	32T	443395	5087136
1.6	1.47599	17.5	32T	443345	5087067
2.6	1.33762	22.7	32T	443345	5087067
3.1	1.79887	22.9	32T	443345	5087067
1.9	0.922495	19.9	32T	443345	5087067
3.4	1.84499	27.2	32T	443345	5087067
3.6	1.66049	22.7	32T	443345	5087067
2.2	0.876371	16.1	32T	443345	5087067
3.1	1.19924	26.8	32T	443345	5087067
4.2	1.56824	29.5	32T	443345	5087067
4	2.16786	20.4	32T	450652	5083484
3.2	2.35236	14.1	32T	450652	5083484
4.3	2.26011	19.3	32T	450652	5083484
4.1	2.39849	21.9	32T	450591	5083495
2.5	1.66049	14.6	32T	450591	5083495
3.5	1.98336	18.9	32T	450591	5083495
3.1	2.16786	16.3	32T	450591	5083495
3.1	1.66049	15.9	32T	450543	5083503
3.2	2.35236	18.2	32T	450543	5083503
3.7	2.02949	24.8	32T	450543	5083503
2.6	2.30624	14.9	32T	450412	5083524
3.1	2.39849	20.5	32T	450303	5083527
3.2	2.30624	16	32T	450303	5083527
3.2	2.62911	17.5	32T	450303	5083527
3.6	2.90586	20.2	32T	450303	5083527
3.1	2.49074	20.1	32T	450303	5083527
4	2.90586	23.2	32T	450225	5083554
3.2	2.49074	19.8	32T	450225	5083554
5.1	2.62911	14.8	32T	450187	5083601
4.1	2.58299	20.9	32T	450128	5083635
4	2.81361	18.7	32T	450128	5083635
3.1	3.18261	14.7	32T	450128	5083635
4.3	2.26011	23.1	32T	450128	5083635
3.5	2.35236	18.4	32T	450054	5083660
3.3	2.58299	21.6	32T	450054	5083660
3.1	2.72136	21.6	32T	450054	5083660
4.4	2.21399	23.5	32T	450054	5083660
2.6	2.72136	28.4	32T	449829	5083635
3.4	3.41323	33.7	32T	449829	5083635
3.8	3.45936	29.1	32T	449829	5083635
2.9	2.16786	15	32T	449580	5083805
3.8	2.58299	23.8	32T	449542	5083916
4.1	3.09036	23.3	32T	449542	5083916
3.7	3.09036	26.5	32T	449469	5084029
2.4	2.62911	24	32T	449469	5084029
3.4	3.09036	29.1	32T	449469	5084029
4.7	2.72136	28.3	32T	449469	5084029
3.5	3.04423	38.8	32T	448637	5083926
2.9	2.99811	34	32T	448637	5083926
3.2	3.32098	38.2	32T	448637	5083926
3.1	2.85974	31.2	32T	448637	5083926
4	2.72136	25.7	32T	448574	5083941
3.6	2.67524	22.9	32T	448574	5083941
3.5	2.21399	18.8	32T	448574	5083941
4.5	2.49074	29.6	32T	448499	5083980
3.5	2.49074	20.6	32T	448499	5083980
4.2	2.07561	25.2	32T	448499	5083980
4	2.35236	29.1	32T	448499	5083980
4.1	2.49074	24.7	32T	448499	5083980
3.9	2.67524	26.6	32T	448466	5084020
3.3	2.30624	25.5	32T	448466	5084020
3.5	2.95198	26	32T	448241	5084013
1.9	2.30624	25.3	32T	448241	5084013
2.6	2.81361	27.1	32T	448241	5084013
3.4	1.89112	23.7	32T	448150	5083963
3.5	2.21399	18.7	32T	448150	5083963
3.8	2.35236	21.8	32T	448150	5083963
3.8	1.66049	20.4	32T	448028	5083926
3.6	2.53686	21.9	32T	448028	5083926
3.3	2.53686	17.6	32T	448028	5083926
4	2.39849	22.8	32T	448028	5083926
4.3	2.85974	22.5	32T	448028	5083926
3.8	1.89112	21.7	32T	447978	5083877
3	2.62911	17.6	32T	447978	5083877
3.7	2.76749	18.7	32T	447936	5083869
2.7	1.56824	18.6	32T	447936	5083869
3.1	2.39849	22.2	32T	447936	5083869
4.7	2.58299	26.1	32T	447878	5083878
4.6	2.76749	22.9	32T	447878	5083878
4.4	2.49074	24.1	32T	447878	5083878
3.8	2.76749	22.1	32T	447838	5083895
3.9	2.76749	20.3	32T	447838	5083895
4	2.12174	23.8	32T	447838	5083895
4.1	1.98336	24	32T	447838	5083874
4.1	2.39849	22.8	32T	447838	5083874
3.8	3.13648	17.6	32T	447641	5083965
3.8	2.72136	19.9	32T	447641	5083965
3.4	2.67524	19.4	32T	447641	5083965
4.4	3.41323	20.8	32T	447568	5084006
3.8	2.58299	18.7	32T	447568	5084006
3	1.93724	15.8	32T	447568	5084006
4.6	2.44461	24.3	32T	447501	5084127
4.4	2.07561	24.4	32T	447342	5084214
5	2.67524	18.2	32T	447342	5084214
5.7	1.98336	17.7	32T	447342	5084214
3.3	1.75274	11.9	32T	447342	5084214
4.4	2.35236	21.6	32T	447229	5084268
4.1	1.89112	21.4	32T	447229	5084268
4.2	2.21399	22.7	32T	447229	5084268
4.3	2.62911	25.4	32T	447229	5084268
2.8	1.79887	18.6	32T	446870	5084260
3.5	2.07561	22.7	32T	446841	5084355
2.8	1.89112	21.5	32T	446841	5084355
3.6	2.62911	21.5	32T	446841	5084355
3.4	2.39849	20.1	32T	446841	5084355
3.1	1.84499	19	32T	446841	5084355
3.2	1.98336	22.5	32T	446542	5084484
2.9	1.75274	20.6	32T	446542	5084484
3.3	2.16786	21.4	32T	446542	5084484
4.1	2.44461	30.2	32T	446582	5084540
3.9	2.39849	23.8	32T	446582	5084540
3.8	2.90586	26.3	32T	446582	5084540
4	2.12174	20.6	32T	446519	5084754
3.4	2.02949	19.3	32T	446506	5084816
3.6	2.44461	22.9	32T	446506	5084816
3	2.81361	18.7	32T	446506	5084816
3.5	2.53686	23.5	32T	446477	5084847
4.2	2.58299	22.6	32T	446477	5084847
3.4	2.35236	22.7	32T	446477	5084847
4.6	2.12174	28.6	32T	446460	5084935
3.3	2.95198	29.6	32T	446460	5084935
4.4	2.53686	26.7	32T	446460	5084935
4	2.62911	23.4	32T	446460	5084935
2.1	4.79698	14.9	32T	446378	5084903
3.2	3.68998	19.7	32T	446378	5084903
3.4	2.30624	28.1	32T	446328	5084922
3.1	2.35236	22.1	32T	446328	5084922
3.4	1.61437	15.7	32T	446328	5084922
3.2	2.16786	18.7	32T	446263	5084915
3.5	2.12174	20.3	32T	446263	5084915
4.5	2.16786	25	32T	446152	5084968
3.2	2.39849	18.8	32T	446152	5084968
3.5	2.12174	17.6	32T	446109	5084946
3.3	2.16786	18.7	32T	446055	5084943
5.7	3.22873	29.5	32T	446055	5084943
3.4	1.75274	17.6	32T	446055	5084943
4.1	2.58299	30.2	32T	446018	5084948
3.8	1.84499	25.5	32T	446018	5084948
3	2.67524	17.5	32T	446018	5084948
3.5	2.76749	26.8	32T	445971	5084968
3.7	2.53686	22.6	32T	445971	5084968
3.6	2.53686	25.8	32T	445971	5084968
3.7	2.58299	29.2	32T	445971	5084968
1.9	1.79887	29.4	32T	445095	5086859
1.6	1.47599	16.2	32T	445095	5086859
1.9	1.84499	25.9	32T	445095	5086859
1.8	1.89112	35.6	32T	445095	5086859
1.5	1.01474	11.8	32T	444661	5087241
0.5	0.876371	5.5	32T	444661	5087241
1.3	1.06087	8.7	32T	444608	5087269
2.6	1.56824	22.8	32T	444608	5087269
2.9	1.15312	23.8	32T	444608	5087269
0.8	1.47599	9.4	32T	444608	5087269
1.5	1.19924	16.8	32T	444576	5087278
1.2	1.29149	14.3	32T	444576	5087278
2.4	1.15312	16.5	32T	444530	5087302
2.3	1.19924	18.5	32T	444530	5087302
1.3	1.19924	14.1	32T	444530	5087302
1.3	0.922495	11.5	32T	444530	5087302
1.6	1.01474	18.3	32T	444530	5087302
1.6	0.96862	14.5	32T	444530	5087302
1.3	1.24537	14.9	32T	444530	5087302
1.7	1.19924	20.1	32T	444530	5087302
2.3	1.01474	19.1	32T	444343	5087452
2.7	0.737996	27.9	32T	444343	5087452
1.7	0.96862	14.6	32T	444343	5087452
1.5	0.876371	18.7	32T	444343	5087452
2.4	1.15312	12	32T	444343	5087452
3.8	0.922495	20.7	32T	444343	5087452
1.3	1.10699	16	32T	444343	5087452
3.1	1.33762	16.5	32T	444343	5087452
1.3	1.52212	22.5	32T	444308	5087486
2	2.44461	47.5	32T	444308	5087486
1.3	1.19924	18.6	32T	444308	5087486
1.7	1.70662	30.6	32T	444308	5087486
2	1.19924	18.8	32T	443718	5087424
2	1.29149	13	32T	443718	5087424
2	0.96862	16	32T	443718	5087424
2.2	1.06087	18.8	32T	443718	5087424
1.8	1.15312	14.2	32T	443718	5087424
2.2	1.19924	17.4	32T	443718	5087424
2.2	1.06087	20.1	32T	443718	5087424
2	1.15312	15.3	32T	443718	5087424
2.7	1.06087	17.3	32T	443666	5087369
3.4	0.96862	22.1	32T	443666	5087369
3.4	1.47599	19.5	32T	443666	5087369
2.8	1.01474	14.9	32T	443666	5087369
3.9	2.07561	30.6	32T	443395	5087136
3.3	1.29149	26.2	32T	443395	5087136
3.9	1.66049	33	32T	443395	5087136
3	1.52212	32	32T	443395	5087136
3.8	1.84499	29.9	32T	443395	5087136
3.9	1.42987	25.5	32T	443395	5087136
3.1	1.52212	26.7	32T	443357	5087085
2.8	1.70662	17.7	32T	443357	5087085
2.6	1.42987	23.8	32T	443357	5087085
2.6	1.66049	28.6	32T	443357	5087085
3.4	1.79887	23.2	32T	443247	5087000
2.9	1.84499	25.4	32T	443247	5087000
3	2.07561	28.2	32T	443193	5087004
2.5	1.06087	19.1	32T	443193	5087004
2.8	1.38374	25.3	32T	443193	5087004
2.8	1.24537	25.6	32T	443193	5087004
2.2	1.75274	29.8	32T	443193	5087004
2.7	1.70662	24.8	32T	443193	5087004
4.2	2.53686	25.9	32T	445772	5085044
3.7	1.61437	26.5	32T	445772	5085044
1.9	1.61437	13	32T	445772	5085044
3.8	2.21399	21	32T	445772	5085044
2.8	1.66049	23.6	32T	445135	5086576
2.5	1.89112	21.1	32T	445135	5086576
2.4	1.98336	23.2	32T	445135	5086576
2	1.56824	20.4	32T	445135	5086576
2.7	1.89112	22.3	32T	445135	5086576
2.7	1.61437	24.7	32T	445135	5086576
3.2	1.56824	24.8	32T	445135	5086576
4	1.93724	19.1	32T	445135	5086576
4.6	1.93724	24.2	32T	445135	5086576
3.7	1.19924	31	32T	445135	5086576
3.6	1.98336	30.4	32T	445135	5086576
2.4	1.33762	20.2	32T	445135	5086576
3.3	1.42987	20.8	32T	445420	5085449
3.2	1.42987	17.1	32T	445420	5085449
2.8	1.84499	16.2	32T	445420	5085449
3.1	1.79887	21.7	32T	445420	5085449
3.5	1.52212	20.7	32T	445420	5085449
4.9	1.33762	24.7	32T	445420	5085449
3	1.29149	15.4	32T	444335	5087460
1.3	1.66049	26.7	32T	444335	5087460
3.5	2.76749	19.2	32T	447613	5083964
3.7	2.85974	15.2	32T	447613	5083964
3.1	2.72136	20.6	32T	447613	5083964
3.9	3.22873	20.6	32T	447613	5083964
4.1	3.41323	28.1	32T	446706	5084125
3.4	2.81361	24.1	32T	446706	5084125
3.1	2.85974	19.7	32T	446706	5084125
4.1	3.36711	27.7	32T	446559	5084449
4.7	2.72136	23.4	32T	446559	5084449
2.4	2.76749	21.6	32T	446472	5084856
3.3	2.95198	22.4	32T	446472	5084856
4.1	2.53686	22	32T	446472	5084856
4.3	2.53686	23	32T	446472	5084856
2.7	3.32098	18.9	32T	446472	5084856
2.7	2.44461	17.9	32T	446472	5084856
2.2	2.90586	17.9	32T	446472	5084856
3.2	1.33762	23.5	32T	442972	5087044
2.7	1.42987	16.1	32T	442972	5087044
2.6	1.70662	27.9	32T	442972	5087044
1.8	1.42987	17	32T	442972	5087044
2.6	1.42987	22.1	32T	442972	5087044
2.8	1.61437	22.9	32T	442972	5087044
2.7	1.42987	25	32T	442972	5087044
2.9	1.75274	19.6	32T	442972	5087044
3	1.70662	22.7	32T	442972	5087044
3.1	0.96862	27.1	32T	442943	5087030
2.6	1.24537	25.3	32T	442943	5087030
3.1	1.47599	22.5	32T	442943	5087030
2.2	1.38374	22.1	32T	442943	5087030
2.6	1.06087	24	32T	442943	5087030
2.4	0.784121	22.5	32T	442943	5087030
1.2	1.06087	14.3	32T	442894	5087059
2.7	1.93724	26.7	32T	443248	5086983
1.9	1.29149	19.1	32T	443171	5086996
3	1.84499	23.6	32T	443171	5086996
1.7	1.38374	16.8	32T	444315	5087488
1.9	1.06087	15.4	32T	444315	5087488
2.4	1.38374	19.5	32T	444315	5087488
1.9	1.93724	22.1	32T	444315	5087488
2	1.52212	19.8	32T	444315	5087488
2.8	0.876371	22.2	32T	444315	5087488
3.4	1.84499	29.5	32T	442203	5087338
3.1	1.75274	21.9	32T	442203	5087338
2.7	1.66049	17.7	32T	442203	5087338
3.1	1.47599	22.9	32T	442203	5087338
2.5	1.52212	17.2	32T	442203	5087338
2.5	1.75274	18.1	32T	442203	5087338
3.1	2.21399	18.3	32T	444484	5087489
3.8	1.70662	26.5	32T	444484	5087489
3.6	2.30624	24.8	32T	444484	5087489
3	2.21399	19.6	32T	444484	5087489
2.9	2.12174	19.1	32T	444484	5087489
3.1	2.02949	23.2	32T	444484	5087489
3.4	2.26011	22.1	32T	444484	5087489
3	2.21399	21.7	32T	444484	5087489
3.2	2.26011	21.8	32T	444484	5087489
3.3	2.58299	19.1	32T	444484	5087489
3.2	2.21399	21.1	32T	444484	5087489
3.5	1.98336	24.8	32T	444484	5087489
3.5	1.98336	24.2	32T	444484	5087489

## Sheet: Mt Stafford
Mt Stafford GRS Data
K (wt%)	U (ppm)	Th (ppm)	UTM Zone	Easting	Northing
3	1.70662	20.5	53K	241351	7567787
4.2	2.16786	19.5	53K	241351	7567787
3.9	2.62911	22.6	53K	241351	7567787
4	0.96862	20.3	53K	241351	7567787
4.2	1.06087	20.3	53K	241351	7567787
4.2	1.19924	19.2	53K	241351	7567787
3.7	1.15312	20	53K	241351	7567787
4.3	1.19924	19.4	53K	241351	7567787
4	1.56824	20.4	53K	241351	7567787
2.4	1.61437	19	53K	241351	7567787
2.4	1.38374	20.5	53K	241351	7567787
2.5	2.12174	22.3	53K	241351	7567787
2.2	1.15312	20.5	53K	241351	7567787
2.4	1.56824	20.4	53K	241351	7567787
2.8	1.89112	17.5	53K	241351	7567787
4.9	2.02949	21	53K	241351	7567787
4.2	1.79887	21.5	53K	241351	7567787
4.3	1.89112	22.6	53K	241351	7567787
4.2	1.79887	20.5	53K	241351	7567787
3.9	1.84499	21.5	53K	241351	7567787
3.9	1.24537	21.2	53K	241351	7567787
3.7	1.56824	20.6	53K	241351	7567787
3.9	1.61437	21.7	53K	241351	7567787
3.9	1.89112	22.3	53K	241351	7567787
3.7	2.39849	22.8	53K	241351	7567787
3.4	1.98336	21.2	53K	241351	7567787
3.9	2.16786	23.2	53K	241351	7567787
4	2.58299	21.1	53K	241351	7567787
4.4	1.42987	23.8	53K	241351	7567787
4	1.47599	21.8	53K	241351	7567787
3.7	1.61437	22.3	53K	241351	7567787
3.9	2.39849	20.7	53K	241351	7567787
4.6	2.53686	19.9	53K	241351	7567787
2.8	1.93724	23.7	53K	241351	7567787
3.6	2.67524	23.6	53K	241351	7567787
2.5	1.89112	19.3	53K	241351	7567787
4.5	2.16786	19.2	53K	241351	7567787
4.9	1.52212	22.1	53K	241351	7567787
3.9	2.72136	21.5	53K	241351	7567787
5.2	1.70662	22.8	53K	241351	7567787
4.8	2.07561	24.8	53K	241351	7567787
4.5	1.79887	22.7	53K	241351	7567787
4.6	2.58299	21.3	53K	241351	7567787
4.3	1.79887	20.5	53K	241351	7567787
4.4	1.84499	21.6	53K	241351	7567787
4.3	1.98336	20.5	53K	241351	7567787
4.3	2.12174	21.7	53K	241351	7567787
4.4	2.30624	20.9	53K	241351	7567787
4	1.84499	22.8	53K	241351	7567787
4.7	2.07561	24.2	53K	241351	7567787
4.5	2.02949	22	53K	241351	7567787
4.2	2.35236	22	53K	241351	7567787
4.3	1.93724	23	53K	241351	7567787
4.5	1.79887	24.2	53K	241379	7567828
4.1	1.66049	21.1	53K	241379	7567828
4.6	1.66049	22.9	53K	241379	7567828
4.9	2.07561	21.9	53K	241379	7567828
4.6	2.02949	22.1	53K	241336	7567840
4.2	1.52212	23.1	53K	241336	7567840
4.3	2.49074	20.9	53K	241315	7567870
4	2.02949	22.3	53K	241315	7567870
4.7	2.16786	23	53K	241303	7567841
4.6	2.21399	21.5	53K	241303	7567841
2.8	2.07561	23.1	53K	241351	7567787
3.5	1.66049	22.9	53K	241351	7567787
3.9	1.47599	20	53K	241351	7567787
3.7	1.61437	20.4	53K	241351	7567787
4.9	1.61437	22.3	53K	241351	7567787
2.3	1.66049	22.2	53K	241351	7567787
2.4	1.93724	20.2	53K	241351	7567787
3.3	1.61437	22.4	53K	241351	7567787
4.1	2.12174	24.7	53K	241351	7567787
4.6	2.26011	21.7	53K	241351	7567787
4.3	1.79887	24.7	53K	241351	7567787
4.3	1.79887	24.1	53K	241351	7567787
4.2	1.84499	23.8	53K	241351	7567787
4.2	1.93724	22.7	53K	241351	7567787
4	2.26011	24.4	53K	241351	7567787
4	1.70662	23	53K	241351	7567787
4.3	2.07561	24.7	53K	241351	7567787
4.7	1.61437	24.8	53K	241351	7567787
2.12	0.945558	15.74	53K	246943	7562149
1.2	0.645747	14.32	53K	246947	7562135
2.92	0.710321	23.02	53K	247184	7562331
4.69	1.54979	23.32	53K	247226	7562362
1.6	1.00552	19.39	53K	248127	7562484
3.38	1.57747	21.54	53K	248704	7562833
5	1.72968	26.47	53K	250367	7561480
4.92	1.67433	24.98	53K	250329	7561484
3.41	1.42064	22.7	53K	250426	7561507
2.12	0.945558	15.74	53K	246943	7562149
1.2	0.645747	14.32	53K	246947	7562135
2.92	0.710321	23.02	53K	247184	7562331
4.69	1.54979	23.32	53K	247226	7562362
1.6	1.00552	19.39	53K	248127	7562484
3.38	1.57747	21.54	53K	248704	7562833
5	1.72968	26.47	53K	250367	7561480
4.92	1.67433	24.98	53K	250329	7561484
3.41	1.42064	22.7	53K	250426	7561507
3.59	1.23153	20.93	53K	250688	7561805
4.99	1.94647	25.18	53K	251159	7562260
5.63	1.80809	25.74	53K	251144	7562275
4.13	1.21308	25.68	53K	251174	7562305
5.6	2.2924	27.02	53K	251195	7562285
5.17	1.95569	27.19	53K	251251	7562300
5.43	1.72507	23.1	53K	251294	7562342
5.21	2.23244	28.44	53K	251344	7562399
4.02	1.91879	25.8	53K	251355	7562416
2.42	1.34223	22.66	53K	251363	7562433
3.9	1.63743	24.61	53K	251365	7562451
4.99	2.08945	25.76	53K	251374	7562488
5.61	2.72597	28.15	53K	251435	7562528
4.4	1.54979	24.42	53K	251448	7562545
5.02	2.11713	26.44	53K	251477	7562573
4.51	1.65127	25.57	53K	251507	7562616
4.96	2.15403	27.03	53K	251537	7562641
5.66	2.61066	27.09	53K	251553	7562651
4.05	1.67433	24.78	53K	251847	7562700
4.86	2.14019	26.04	53K	251886	7562769
5.38	2.59682	26.94	53K	251910	7562821
4.8	2.05255	26.01	53K	251967	7562885
5.67	1.96491	27.49	53K	252002	7562913
3.82	1.54979	23.22	53K	252078	7562935
2.02	1.25921	22.16	53K	252147	7562949
4.06	1.76658	25.44	53K	251912	7563398
3.2	1.42526	23.25	53K	251963	7563443
3.04	1.36529	24.26	53K	252028	7563482
4.45	1.82654	25.63	53K	252091	7563531
3.25	1.52212	22.28	53K	252103	7563599
4.17	2.24166	23.73	53K	252153	7563759
3.17	1.43448	25.22	53K	252235	7563901
2.58	1.26382	22.09	53K	252277	7563982
2.43	1.42064	19.8	53K	252317	7563962
3.35	1.24076	21.09	53K	252343	7563950
3.9	1.33301	21.44	53K	252341	7564072
2.68	1.02858	24.06	53K	252395	7564125
4.52	1.44371	22.86	53K	252455	7564172
4.2	1.27304	22.22	53K	252568	7564194
2.87	1.21769	22.67	53K	252694	7564226
2.49	1.30533	22.97	53K	252826	7564191
2.95	1.39297	23.84	53K	253033	7564136
3.12	1.86805	22.33	53K	253107	7564162
2.66	0.880983	23.17	53K	253223	7564180
2.57	1.59592	24.57	53K	253564	7564365
4.18	2.04794	26.16	53K	253610	7564431
4.18	1.72968	23.42	53K	253715	7564384
2.4	1.07932	23.09	53K	253835	7564385
2.17	1.19924	22.93	53K	253916	7564451
3.93	1.66972	23.49	53K	253972	7564466
3.22	1.6282	21.67	53K	254022	7564515
2.33	1.42526	22.36	53K	254088	7564514
1.81	1.60514	24.18	53K	254190	7564503
3.59	1.23153	20.93	53K	250688	7561805
5.63	1.80809	25.74	53K	251144	7562275
4.99	1.94647	25.18	53K	251159	7562260
4.13	1.21308	25.68	53K	251174	7562305
5.6	2.2924	27.02	53K	251195	7562285
5.17	1.95569	27.19	53K	251251	7562300
5.43	1.72507	23.1	53K	251294	7562342
5.21	2.23244	28.44	53K	251344	7562399
4.02	1.91879	25.8	53K	251355	7562416
2.42	1.34223	22.66	53K	251363	7562433
3.9	1.63743	24.61	53K	251365	7562451
4.99	2.08945	25.76	53K	251374	7562488
5.61	2.72597	28.15	53K	251435	7562528
4.4	1.54979	24.42	53K	251448	7562545
3.1	2.21399	19.2	53K	251469	7562340
2.9	1.98336	23	53K	251469	7562340
4.9	2.53686	20.4	53K	251470	7562325
4.6	2.44461	24.3	53K	251470	7562325
2.8	2.07561	20.8	53K	251472	7562338
3	2.21399	19.8	53K	251472	7562338
5.02	2.11713	26.44	53K	251477	7562573
3	1.93724	20.8	53K	251478	7562241
3.2	1.84499	21.3	53K	251478	7562241
2.7	1.66049	21.2	53K	251478	7562241
2.8	1.75274	20.2	53K	251478	7562241
4.8	2.90586	26.3	53K	251478	7562241
4.9	2.58299	25.4	53K	251478	7562241
3.8	2.30624	23.3	53K	251478	7562241
4.6	2.81361	25.9	53K	251478	7562241
3.7	2.85974	25.3	53K	251478	7562241
3.3	2.21399	25.5	53K	251478	7562241
4.1	2.67524	25.7	53K	251478	7562241
3.3	2.12174	23.1	53K	251478	7562241
4.6	2.81361	24.2	53K	251478	7562241
3.6	2.26011	26.4	53K	251478	7562241
5.6	3.18261	25.2	53K	251478	7562241
5.3	2.30624	25	53K	251478	7562241
3.1	2.44461	24.6	53K	251478	7562241
4.2	1.79887	21.6	53K	251478	7562241
4.5	2.62911	23.7	53K	251478	7562241
2.7	2.30624	22.2	53K	251478	7562241
2.7	1.56824	20.4	53K	251478	7562241
3.8	1.61437	23.7	53K	251478	7562241
2.9	1.79887	23.5	53K	251478	7562241
4.5	2.76749	23.5	53K	251478	7562241
3.6	2.16786	19.5	53K	251478	7562241
4.4	2.44461	23.7	53K	251478	7562241
3.5	2.21399	21.1	53K	251478	7562241
3.4	1.98336	22.4	53K	251478	7562241
3.5	2.12174	22.7	53K	251478	7562241
4	1.75274	23.3	53K	251478	7562241
3.8	2.53686	24.7	53K	251478	7562241
4.4	2.62911	24.3	53K	251478	7562241
3.8	2.39849	21.7	53K	251478	7562241
3.7	1.98336	22.5	53K	251478	7562241
4.4	2.39849	20.7	53K	251478	7562241
2.4	1.93724	21.7	53K	251478	7562241
3.7	2.26011	22.4	53K	251478	7562241
4.6	2.72136	24.5	53K	251489	7562370
4.4	2.30624	23.6	53K	251489	7562370
3	2.07561	19.4	53K	251491	7562241
3.1	2.02949	20.6	53K	251491	7562241
3.2	1.84499	18.9	53K	251491	7562241
4.51	1.65127	25.57	53K	251507	7562616
2.8	2.26011	16.8	53K	251529	7562393
2.9	1.98336	19.2	53K	251529	7562393
4.3	2.58299	21.7	53K	251532	7562406
3.8	2.35236	22.7	53K	251532	7562406
4.96	2.15403	27.03	53K	251537	7562641
3.7	2.16786	18.2	53K	251544	7562424
3.6	2.39849	22.3	53K	251544	7562424
5.66	2.61066	27.09	53K	251553	7562651
3.7	2.44461	24.2	53K	251560	7562466
3.2	1.98336	22	53K	251560	7562466
4.1	2.95198	22.5	53K	251571	7562491
4.7	2.67524	24.5	53K	251571	7562491
4.6	1.93724	23.4	53K	251598	7562523
4.2	2.12174	19	53K	251598	7562523
3.1	1.79887	22	53K	251618	7562551
2.7	2.44461	20.4	53K	251618	7562551
2.9	2.90586	25.9	53K	251638	7562555
2.6	2.72136	30.1	53K	251638	7562555
4.05	1.67433	24.78	53K	251847	7562700
4.86	2.14019	26.04	53K	251886	7562769
5.38	2.59682	26.94	53K	251910	7562821
4.06	1.76658	25.44	53K	251912	7563398
3.2	1.42526	23.25	53K	251963	7563443
4.8	2.05255	26.01	53K	251967	7562885
5	3.32098	26.6	53K	252002	7562935
5.67	1.96491	27.49	53K	252002	7562913
5	3.04423	24.1	53K	252003	7562884
3.9	2.72136	22.8	53K	252003	7562884
4.8	2.90586	23.3	53K	252003	7562884
5.3	3.36711	23.1	53K	252003	7562884
5.5	3.04423	23.1	53K	252003	7562884
4.9	2.85974	23.4	53K	252003	7562884
5.2	3.36711	22.9	53K	252003	7562884
5.6	3.45936	26.1	53K	252003	7562884
5.4	2.99811	23.4	53K	252003	7562884
4.1	2.62911	23.6	53K	252003	7562884
5.6	3.45936	22.8	53K	252003	7562884
3.2	2.44461	23.6	53K	252003	7562884
2.3	1.70662	19.8	53K	252003	7562884
4.7	2.62911	25.4	53K	252003	7562884
3.8	1.89112	23.1	53K	252003	7562884
3.6	1.66049	23.8	53K	252003	7562884
4.1	2.21399	26.8	53K	252003	7562884
4.9	2.58299	25.8	53K	252003	7562884
4.9	2.44461	22.7	53K	252003	7562884
4.3	2.67524	22.7	53K	252003	7562884
4.6	2.44461	22.5	53K	252003	7562884
4.6	2.02949	25.3	53K	252003	7562884
4.9	3.50548	25.8	53K	252003	7562884
4.1	2.58299	25.9	53K	252003	7562884
4.8	3.13648	27	53K	252003	7562884
4.6	2.26011	25.2	53K	252003	7562884
4.9	2.49074	28.7	53K	252003	7562884
5.4	2.95198	25.1	53K	252003	7562884
5.1	2.39849	28	53K	252003	7562884
4.8	3.18261	26.5	53K	252003	7562884
4.5	2.90586	25.1	53K	252003	7562884
4.5	2.16786	25.7	53K	252003	7562884
4.6	2.76749	24.7	53K	252003	7562884
4.7	2.39849	25.7	53K	252004	7562905
3.2	2.44461	21.8	53K	252004	7562905
3.04	1.36529	24.26	53K	252028	7563482
3.82	1.54979	23.22	53K	252078	7562935
4.45	1.82654	25.63	53K	252091	7563531
3.25	1.52212	22.28	53K	252103	7563599
2.02	1.25921	22.16	53K	252147	7562949
4.17	2.24166	23.73	53K	252153	7563759
3.17	1.43448	25.22	53K	252235	7563901
2.58	1.26382	22.09	53K	252277	7563982
2.43	1.42064	19.8	53K	252317	7563962
4.3	2.67524	23.1	53K	252340	7564026
5.2	3.22873	28.7	53K	252340	7564026
4	3.55161	26.5	53K	252340	7564026
4.4	2.85974	22.5	53K	252340	7564026
4.3	2.44461	25.1	53K	252340	7564026
3.1	2.53686	20.6	53K	252340	7564026
3.7	2.58299	27.7	53K	252340	7564026
4.6	2.30624	26.4	53K	252340	7564026
5	1.93724	21	53K	252340	7564026
4.1	1.93724	22.7	53K	252340	7564026
4.1	2.67524	22.8	53K	252340	7564026
4	1.84499	21	53K	252340	7564026
3.8	1.38374	19.8	53K	252340	7564026
2.4	1.33762	21.6	53K	252340	7564026
4.9	2.49074	23.8	53K	252340	7564026
3.6	2.39849	20	53K	252340	7564026
4.6	2.58299	26.7	53K	252340	7564026
3.1	2.26011	19.9	53K	252340	7564026
3.5	1.89112	21.8	53K	252340	7564026
4.8	2.35236	23.2	53K	252340	7564026
4.3	2.02949	24.4	53K	252340	7564026
4.2	1.75274	22.6	53K	252340	7564026
2.7	1.84499	23	53K	252340	7564026
4.8	1.38374	23.2	53K	252340	7564026
4.8	2.76749	25.1	53K	252340	7564026
3.2	1.98336	21.5	53K	252340	7564026
5	2.26011	47.5	53K	252340	7564026
4.2	2.26011	21.1	53K	252340	7564026
4.4	2.39849	23.4	53K	252340	7564026
3.7	1.98336	19.5	53K	252340	7564026
3.2	1.98336	23.5	53K	252340	7564026
3.1	2.12174	21.6	53K	252340	7564026
4.7	3.09036	26.3	53K	252340	7564026
5.8	2.58299	29.7	53K	252340	7564026
4.9	2.30624	21.7	53K	252340	7564026
4.5	2.62911	22.2	53K	252340	7564026
4.3	1.98336	18.5	53K	252340	7564026
2.8	1.75274	21.4	53K	252340	7564026
4.3	2.76749	21.5	53K	252340	7564026
4.3	2.30624	20.9	53K	252340	7564026
3.9	1.33301	21.44	53K	252341	7564072
3.35	1.24076	21.09	53K	252343	7563950
2.68	1.02858	24.06	53K	252395	7564125
4.52	1.44371	22.86	53K	252455	7564172
4.2	1.27304	22.22	53K	252568	7564194
2.87	1.21769	22.67	53K	252694	7564226
2.49	1.30533	22.97	53K	252826	7564191
3.1	2.30624	24	53K	252919	7564197
3.4	2.67524	23	53K	252919	7564197
5.1	2.07561	20.1	53K	252919	7564197
3.9	1.66049	19.5	53K	252919	7564197
3.1	1.93724	24.1	53K	252919	7564197
3.7	2.02949	23.6	53K	252919	7564197
3.6	1.79887	22.1	53K	252919	7564197
4.2	2.12174	23.3	53K	252919	7564197
4.7	2.30624	21.7	53K	252919	7564197
4.9	2.35236	26.2	53K	252919	7564197
4.5	2.02949	27.3	53K	252919	7564197
4.1	2.16786	24.3	53K	252919	7564197
1.9	2.02949	20.4	53K	252919	7564197
1.2	1.24537	25.3	53K	252919	7564197
3.6	1.98336	23.2	53K	252919	7564197
2.6	2.30624	20.9	53K	252919	7564197
5.3	3.41323	43.9	53K	252919	7564197
4.2	3.36711	38.6	53K	252919	7564197
2.8	2.16786	17.7	53K	252919	7564197
3.4	2.53686	23	53K	252919	7564197
5.1	2.39849	23.7	53K	252919	7564197
2.6	2.12174	23.1	53K	252919	7564197
3.6	2.16786	23.7	53K	252919	7564197
3	2.39849	23.8	53K	252919	7564197
5.4	2.58299	26.1	53K	252919	7564197
3.9	2.49074	24.2	53K	252919	7564197
4.8	2.72136	22.8	53K	252919	7564197
2.1	2.21399	27.8	53K	252919	7564197
1.3	1.42987	21.7	53K	252919	7564197
3.9	2.39849	21.8	53K	252919	7564197
2.8	2.07561	20.5	53K	252919	7564197
4.5	3.78223	35.1	53K	252919	7564197
4.9	3.87448	35	53K	252919	7564197
4.2	1.98336	20.9	53K	252919	7564197
2.4	2.07561	22.9	53K	252919	7564197
2.7	2.39849	19.5	53K	252919	7564197
2.9	2.02949	22.2	53K	252919	7564197
3.4	2.26011	22.2	53K	252919	7564197
3.4	2.26011	21.3	53K	252919	7564197
4.3	2.12174	22.1	53K	252919	7564197
1.9	1.47599	22.9	53K	252919	7564197
3.9	1.93724	28	53K	252919	7564197
3.3	1.70662	27.9	53K	252919	7564197
1.7	2.07561	31.9	53K	252919	7564197
1.4	0.96862	20.3	53K	252919	7564197
2.1	1.89112	21.5	53K	252919	7564197
1.7	1.52212	20.4	53K	252919	7564197
4.3	2.90586	23.7	53K	252919	7564197
3.2	2.58299	19.7	53K	252919	7564197
3.9	2.49074	22.4	53K	252919	7564197
4.9	2.81361	22.9	53K	252919	7564197
3.9	2.53686	24.9	53K	252919	7564197
3.1	2.21399	21.8	53K	252919	7564197
4.8	1.98336	21.3	53K	252919	7564214
3.5	2.12174	21.1	53K	252924	7564221
2.4	1.98336	24.3	53K	252946	7564246
1.4	2.30624	21	53K	252946	7564246
3.8	2.76749	23.3	53K	252969	7564251
2.8	1.79887	24.3	53K	252990	7564256
3.5	2.30624	23.6	53K	253001	7564249
3.2	2.02949	23.1	53K	253017	7564247
2.95	1.39297	23.84	53K	253033	7564136
3	1.84499	21.1	53K	253060	7564223
4.5	3.13648	21.5	53K	253106	7564178
3.12	1.86805	22.33	53K	253107	7564162
2.66	0.880983	23.17	53K	253223	7564180
4	2.76749	20.2	53K	255286	7560353
5.2	2.44461	27	53K	255286	7560353
4.9	3.41323	27	53K	255286	7560353
3	1.61437	22.5	53K	255286	7560353
4.8	2.49074	22.7	53K	255286	7560353
3.8	2.39849	22.9	53K	255286	7560353
3.7	2.35236	22.3	53K	255286	7560353
4.2	2.39849	23.6	53K	255286	7560353
2.7	1.75274	28.9	53K	255286	7560353
4.8	2.90586	25.1	53K	255286	7560353
3.5	2.58299	20.1	53K	255286	7560353
3.3	2.58299	20.4	53K	255286	7560353
4.9	2.76749	25	53K	255286	7560353
4.4	2.44461	24	53K	255286	7560353
4	2.26011	20.6	53K	255286	7560353
4.2	2.07561	22.7	53K	255286	7560353
4.4	2.85974	25	53K	255286	7560353
4.7	2.49074	25.2	53K	255286	7560353
4.1	2.58299	20.2	53K	255286	7560353
3	1.98336	21.5	53K	255286	7560353
5.4	2.21399	24.3	53K	255286	7560353
3.5	1.93724	22.4	53K	255286	7560353
5	2.95198	23.5	53K	255286	7560353
4.5	2.53686	23.3	53K	255286	7560353
4.8	2.39849	20.9	53K	255286	7560353
5	3.22873	24.4	53K	255286	7560353
3.4	1.98336	23.5	53K	255286	7560353
3.1	1.52212	22.1	53K	255286	7560353
4.4	2.58299	22.6	53K	255286	7560353
4.1	2.35236	22.4	53K	255286	7560353
2.7	2.21399	22.1	53K	255286	7560353
5.3	2.58299	23.9	53K	255286	7560353
3.4	2.44461	25.1	53K	258519	7566070
4.1	5.2121	39.9	53K	258519	7566070
4.2	3.22873	37.2	53K	258519	7566070
3.9	3.04423	25.3	53K	258519	7566070
2.8	2.44461	22.9	53K	258519	7566070
2.6	2.53686	23	53K	258519	7566070
3.5	2.85974	20.9	53K	258519	7566070
1.8	2.21399	19.3	53K	258519	7566070
2.1	2.67524	17.3	53K	258519	7566070
3.5	3.45936	25.8	53K	258519	7566070
2.4	2.02949	21.2	53K	258519	7566070
3.5	3.32098	23.7	53K	258519	7566070
3.1	2.16786	21.3	53K	258519	7566070
3.2	2.72136	21.9	53K	258519	7566070
3.2	2.67524	27.6	53K	258519	7566070
4.1	2.72136	27.2	53K	258519	7566070
2.3	2.62911	25	53K	258519	7566070
2.8	2.85974	25.2	53K	258519	7566070
2.9	2.58299	26.7	53K	258519	7566070
3.8	2.67524	26.8	53K	258519	7566070
3.4	2.99811	23.3	53K	258519	7566070
3.1	2.26011	23.8	53K	258519	7566070
2.8	2.62911	22.5	53K	258519	7566070
3.5	2.35236	28.1	53K	258519	7566070
4.1	3.22873	26.5	53K	258519	7566070
2.4	2.26011	25.2	53K	258519	7566070
4.3	2.90586	29.9	53K	258519	7566070
2.7	2.58299	21.1	53K	258519	7566070
4.1	2.90586	25.8	53K	258519	7566070
2.8	2.35236	18.5	53K	258519	7566070
3.8	3.09036	26.9	53K	258519	7566070
3.8	2.85974	24.5	53K	258519	7566070
2.8	3.09036	20.6	53K	258519	7566070
4.4	2.99811	27.5	53K	258519	7566070
3.6	2.81361	26	53K	258519	7566070
3.4	2.35236	25.5	53K	258519	7566070
4.5	3.09036	27.2	53K	258519	7566070
3.1	2.44461	23.1	53K	258519	7566070
4.1	3.27486	28.7	53K	258519	7566070
4	3.82836	28.1	53K	258519	7566070
4.6	3.73611	29.1	53K	258519	7566070
4.7	4.05898	25.4	53K	258519	7566070
3.7	3.22873	34.8	53K	258831	7566466
3.7	2.76749	38.1	53K	258831	7566466
3.6	2.99811	32.7	53K	258831	7566466
4.1	3.04423	36.4	53K	258831	7566466
3.7	2.95198	36.8	53K	258831	7566466
3.9	4.05898	35	53K	258831	7566466
3.4	2.76749	35	53K	258831	7566466
3.6	2.72136	32.5	53K	258831	7566466
3.1	2.85974	32.6	53K	258831	7566466
3.8	3.13648	42.2	53K	258831	7566466
3.7	3.18261	33	53K	259078	7566925
4.8	2.90586	46.5	53K	259078	7566925
5.8	2.95198	16.1	53K	259078	7566925
4.7	2.53686	44.6	53K	259078	7566925
4.4	2.62911	44.9	53K	259078	7566925
3.1	1.84499	26.7	53K	259976	7564102
3.3	2.02949	21.9	53K	259976	7564102
4	2.67524	29.8	53K	259976	7564102
3.2	1.84499	24.8	53K	259976	7564102
3.5	2.02949	29.5	53K	259976	7564102
5.4	2.95198	31.7	53K	259976	7564102
3	1.79887	26.6	53K	259976	7564102
2.7	2.12174	27.9	53K	259976	7564102
3.2	2.21399	23.3	53K	259976	7564102
2.8	2.72136	29.4	53K	259976	7564102
3.8	3.04423	35.7	53K	259976	7564102
4.4	2.53686	28.8	53K	259976	7564102
4.1	2.16786	29.5	53K	259318	7563216
3.6	2.21399	32.9	53K	251251	7562300
2.5	2.26011	24.7	53K	251251	7562300
2.8	1.70662	26.3	53K	251251	7562300
4.1	2.30624	33.6	53K	251251	7562300
2.6	1.75274	27.5	53K	251251	7562300
4.3	2.62911	32.4	53K	251251	7562300
3.3	1.98336	24	53K	251251	7562300
1.9	1.61437	21.8	53K	251251	7562300
2.9	1.93724	25	53K	251251	7562300
3.2	2.07561	29.1	53K	251251	7562300
1.7	1.75274	21.6	53K	251251	7562300
2	2.02949	25.4	53K	251251	7562300
3.1	2.95198	29.6	53K	251251	7562300
5.3	2.72136	35.6	53K	251251	7562300
5.4	3.18261	34.1	53K	251251	7562300
5.2	3.18261	31.2	53K	251251	7562300
1.7	1.70662	25.3	53K	258861	7562864
5.8	2.72136	37.5	53K	258861	7562864
6	2.49074	35.3	53K	258861	7562864
6.6	3.04423	40.7	53K	258861	7562864
5.4	2.90586	35.3	53K	258861	7562864
5.7	2.76749	34.6	53K	258861	7562864
4.8	3.22873	34.3	53K	258861	7562864
4.9	2.49074	37.2	53K	258861	7562864
1.9	1.47599	22.2	53K	258861	7562864
2.1	1.47599	19	53K	258861	7562864
4	2.39849	28.9	53K	258861	7562864
3.2	2.26011	28.7	53K	258861	7562864
4	2.49074	33.1	53K	258861	7562864
4.5	2.44461	33	53K	258861	7562864
3.4	2.72136	32.1	53K	258861	7562864
1.6	2.72136	29.3	53K	258861	7562864
5.1	3.27486	34.5	53K	258861	7562864
2.7	2.49074	24.8	53K	258861	7562864
2.4	2.12174	22.4	53K	258861	7562864
5.2	2.44461	32.6	53K	258861	7562864
6.1	3.09036	37.9	53K	258861	7562864
5.9	3.04423	33.9	53K	258861	7562864
5.6	2.44461	35	53K	258861	7562864
2.3	1.70662	24.4	53K	258861	7562894
2.9	2.39849	23.8	53K	258861	7562944
4.5	2.49074	33	53K	258861	7562944
3	2.30624	30.6	53K	258861	7562944
7.1	3.18261	41.7	53K	258861	7562944
3.8	2.16786	30.6	53K	258861	7562944
2.4	1.61437	24.1	53K	258861	7562944
2.6	2.44461	25.6	53K	259320	7563275
4.4	2.62911	35.4	53K	259320	7563275
1.7	2.35236	26.1	53K	259320	7563275
2.8	2.44461	28.8	53K	259320	7563275
3.7	2.49074	29.1	53K	259320	7563275
4.7	2.21399	28.5	53K	259320	7563275
4.5	3.13648	27.4	53K	259320	7563275
2.8	2.21399	22.5	53K	259320	7563275
3.5	2.58299	25.4	53K	259320	7563275
6.3	3.18261	36.7	53K	259320	7563275
6.5	3.13648	40.3	53K	259320	7563275
3.49	1.79425	26.79	53K	259330	7563364
4.04	1.57747	30.97	53K	259431	7563405
4.44	2.04794	28.3	53K	259581	7563384
4.62	1.5544	29.77	53K	259707	7563360
4.51	1.87728	30.98	53K	259858	7563357
5.38	2.16325	32.84	53K	259985	7563369
4.29	1.70662	29.12	53K	260143	7563419
4.15	0.885595	26.76	53K	260253	7563409
4.44	1.94185	23.88	53K	254277	7564508
3.13	1.41142	26.64	53K	254358	7564485
2.25	1.82193	25.04	53K	254463	7564485
2.77	1.57285	25.13	53K	254563	7564493
2.49	1.34684	24.72	53K	254662	7564478
2.53	0.899433	22.81	53K	254750	7564483
2.75	1.59592	23.3	53K	254825	7564488
4.06	2.2555	25.95	53K	254944	7564495
3.18	1.4806	26.26	53K	255020	7564496
4.56	1.32839	43.09	53K	255069	7564523
4.11	2.02026	28.23	53K	254326	7565012
3.49	1.79425	26.79	53K	259330	7563364
4.04	1.57747	30.97	53K	259431	7563405
4.44	2.04794	28.3	53K	259581	7563384
4.62	1.5544	29.77	53K	259707	7563360
4.51	1.87728	30.98	53K	259858	7563357
5.38	2.16325	32.84	53K	259985	7563369
4.29	1.70662	29.12	53K	260143	7563419
4.15	0.885595	26.76	53K	260253	7563409
5.2	3.09036	23.6	53K	255286	7560353
3.5	2.62911	25.4	53K	255286	7560353
3.2	2.49074	20.6	53K	255286	7560353
4.2	2.26011	22.1	53K	255286	7560353
3.8	2.02949	24	53K	255286	7560353
4.4	2.76749	22.9	53K	255286	7560353
2.7	1.89112	23.2	53K	255286	7560353
4	2.95198	21.6	53K	255286	7560353
4.2	3.09036	24.9	53K	255286	7560353
3	2.44461	21.1	53K	255286	7560353
3.2	2.53686	19.4	53K	255286	7560353
2.6	2.21399	19.2	53K	255286	7560353
2.7	2.39849	20.6	53K	255286	7560353
2.5	2.02949	23.4	53K	255286	7560353
1.8	2.35236	23.2	53K	255286	7560353
2.5	2.62911	23.9	53K	255286	7560353
2.7	2.16786	19.2	53K	255286	7560353
2.9	2.26011	21.5	53K	255286	7560353
2.7	2.21399	21.7	53K	255286	7560353
3.1	2.12174	23.9	53K	255286	7560353
2.3	1.56824	18.9	53K	255286	7560353
4.5	2.99811	25.5	53K	255286	7560353
4.3	2.90586	21.1	53K	255286	7560353
3.1	1.93724	23.9	53K	255286	7560353
3	1.52212	23.8	53K	255286	7560353
1.7	2.12174	33.1	53K	255286	7560353
3.1	1.79887	26.3	53K	255286	7560353
2.8	1.61437	21.5	53K	255286	7560353
4.2	2.67524	20.8	53K	255286	7560353
4.1	2.16786	23.4	53K	255286	7560353
3.7	3.18261	23.1	53K	255286	7560353
3.5	2.02949	20.5	53K	255286	7560353
2.7	2.12174	21.8	53K	255286	7560353
2.7	1.98336	21.3	53K	255286	7560353
3.6	1.79887	21.7	53K	255286	7560353
2.5	1.70662	23.5	53K	255286	7560353
2.8	1.66049	24.4	53K	255286	7560353
3.8	2.07561	21.8	53K	255286	7560353
1.8	1.42987	19.4	53K	255286	7560353
2.2	2.16786	28.1	53K	255286	7560353
2.6	2.07561	21.5	53K	255286	7560353
2.2	2.02949	23.8	53K	255286	7560353
2.4	1.93724	22	53K	255286	7560353
2.5	1.93724	20.4	53K	255286	7560353
2.3	1.79887	22.3	53K	255286	7560353
2.7	2.30624	23.7	53K	255286	7560353
2.4	1.98336	23.4	53K	255286	7560353
2.7	2.30624	22.3	53K	255286	7560353
4.2	2.85974	29.8	53K	255286	7560353
3	2.21399	22.8	53K	255286	7560353
2.7	1.98336	23.6	53K	255286	7560353
4.1	2.81361	22.9	53K	255286	7560353
4	2.35236	22.4	53K	255286	7560353
4.4	2.35236	21	53K	255286	7560353
3.3	1.93724	22	53K	255286	7560353
3.1	1.89112	27.1	53K	255286	7560353
2.2	2.12174	21.9	53K	255286	7560353
4.6	2.72136	23.3	53K	255286	7560353
3.6	1.98336	22.4	53K	255286	7560353
2.9	1.93724	23.9	53K	255286	7560353
2.8	2.26011	21.8	53K	255342	7560376
2.2	2.21399	25.5	53K	255342	7560376
2.5	2.26011	24.1	53K	255367	7560386
2.5	1.98336	21.7	53K	255381	7560390
3.1	2.02949	21.6	53K	255402	7560404
2.6	1.79887	23.1	53K	255413	7560417
4.4	2.58299	22.8	53K	255413	7560417
2.8	1.98336	23.6	53K	255430	7560450
4.1	2.58299	22.1	53K	255432	7560458
5	2.44461	29.7	53K	255398	7560529
2.9	1.75274	26.4	53K	255392	7560547
3.5	2.26011	24.9	53K	255392	7560547
2.4	2.02949	25.8	53K	255390	7560556
4.7	2.67524	19.4	53K	255463	7560556
4.1	2.16786	22.9	53K	255463	7560556
4.9	3.18261	20.8	53K	255463	7560556
4.9	2.12174	21.4	53K	255463	7560556
4.6	2.62911	20.8	53K	255463	7560556
2.4	2.39849	21.8	53K	255463	7560556
4.6	2.12174	22.6	53K	255463	7560556
3.7	2.49074	20.8	53K	255469	7560566
3	2.30624	28.4	53K	255398	7560570
2.5	2.07561	24.1	53K	255487	7560571
3.4	2.26011	23.9	53K	255546	7560607
4.4	3.04423	28.1	53K	255553	7560611
2.57	1.59592	24.57	53K	253564	7564365
4.18	1.72968	23.42	53K	253715	7564384
2.4	1.07932	23.09	53K	253835	7564385
4.6	2.12174	22.5	53K	253521	7564398
5.1	3.04423	27.9	53K	253538	7564411
4	3.04423	22.6	53K	253538	7564411
4.1	2.90586	23.3	53K	253538	7564411
4.6	3.04423	24.8	53K	253538	7564411
4	2.62911	25.6	53K	253538	7564411
3.7	2.35236	23.7	53K	253538	7564411
5	2.67524	22.8	53K	253538	7564411
4.8	2.76749	28.6	53K	253538	7564411
4.5	2.62911	21.3	53K	253538	7564411
4	2.95198	24.6	53K	253538	7564411
4.1	3.13648	23.4	53K	253538	7564411
4.3	2.90586	23.8	53K	253538	7564411
4.3	2.30624	21.8	53K	253538	7564411
3.8	2.95198	24.7	53K	253538	7564411
4.2	2.72136	19.6	53K	253538	7564411
4.2	3.04423	21.6	53K	253538	7564411
4	2.53686	21.5	53K	253538	7564411
5.4	2.76749	20.8	53K	253538	7564411
5.5	3.13648	21.2	53K	253538	7564411
3.6	2.26011	19.8	53K	253538	7564411
3.9	3.18261	21.2	53K	253538	7564411
5	3.36711	24.8	53K	253538	7564411
5	2.30624	23.5	53K	253538	7564411
4.2	3.04423	21.4	53K	253538	7564411
4.5	3.27486	23.4	53K	253538	7564411
4.1	3.04423	20.1	53K	253538	7564411
4.5	3.50548	20.4	53K	253538	7564411
4.7	2.95198	23.3	53K	253538	7564411
4.6	3.09036	21.1	53K	253538	7564411
3.3	2.07561	19.8	53K	253538	7564411
5	2.85974	23.8	53K	253538	7564411
4	2.58299	19.4	53K	253538	7564411
4.5	2.67524	20.2	53K	253538	7564411
4.2	2.53686	21	53K	253538	7564411
2.8	2.16786	22.4	53K	253538	7564411
4.4	2.90586	21.4	53K	253538	7564411
3.8	2.21399	21	53K	253538	7564411
5.1	2.44461	19.2	53K	253538	7564411
4.18	2.04794	26.16	53K	253610	7564431
3.4	2.85974	26	53K	253523	7564436
3.3	2.12174	23.4	53K	253523	7564436
2.17	1.19924	22.93	53K	253916	7564451
3.93	1.66972	23.49	53K	253972	7564466
2.49	1.34684	24.72	53K	254662	7564478
2.53	0.899433	22.81	53K	254750	7564483
3.13	1.41142	26.64	53K	254358	7564485
2.25	1.82193	25.04	53K	254463	7564485
2.75	1.59592	23.3	53K	254825	7564488
2.77	1.57285	25.13	53K	254563	7564493
4.06	2.2555	25.95	53K	254944	7564495
3.18	1.4806	26.26	53K	255020	7564496
1.81	1.60514	24.18	53K	254190	7564503
4.44	1.94185	23.88	53K	254277	7564508
2.33	1.42526	22.36	53K	254088	7564514
3.22	1.6282	21.67	53K	254022	7564515
4.56	1.32839	43.09	53K	259976	7564102
4.1	2.62911	25.5	53K	259976	7564102
4.2	2.81361	34.2	53K	259976	7564102
3.7	1.89112	25.9	53K	259976	7564102
2.7	2.16786	21.6	53K	259362	7563665
3.7	1.75274	24.3	53K	259362	7563665
2.1	1.42987	20.4	53K	259362	7563665
3.4	1.89112	26.4	53K	259383	7563427
3.6	1.70662	31.1	53K	259383	7563427
2.7	1.75274	25.9	53K	259383	7563427
4.7	2.85974	37	53K	259383	7563427
2.2	2.12174	23.8	53K	259383	7563427
4.8	2.67524	38.4	53K	259383	7563427
5.6	3.13648	31.1	53K	259383	7563427
5.4	2.39849	37.7	53K	259383	7563427
2.8	1.70662	25.3	53K	259383	7563427
1.9	1.29149	20.8	53K	259383	7563427
2.4	1.89112	23.1	53K	259383	7563427
3	1.84499	30.5	53K	259383	7563427
3.4	2.53686	32.3	53K	259383	7563427
5	2.12174	34.9	53K	259383	7563427
4.6	2.81361	31.5	53K	259383	7563427
2.3	1.79887	27.6	53K	259383	7563427
4.5	2.76749	28.6	53K	259383	7563427
5.6	2.72136	36.9	53K	259383	7563427
7.3	3.82836	41.8	53K	259383	7563427
5.3	3.13648	35.4	53K	259383	7563427
2	1.75274	21.9	53K	259383	7563427
3.6	2.76749	30.5	53K	259383	7563427
5	3.04423	35.4	53K	259383	7563427
4.9	2.49074	31.7	53K	259383	7563427
4.4	2.12174	32.9	53K	259383	7563427
4.4	2.39849	35.1	53K	259383	7563427
2.5	1.56824	21.7	53K	259383	7563427
2.1	1.79887	21.8	53K	259383	7563427
2.9	2.21399	27.7	53K	259383	7563427
4.7	2.99811	39.3	53K	259383	7563427
2.2	2.26011	28	53K	259383	7563427
1.6	2.21399	21.8	53K	259383	7563427
3.5	2.49074	33.8	53K	259383	7563427
4	2.39849	32.6	53K	259383	7563427
4.5	2.44461	33.1	53K	259383	7563427
1.6	2.35236	21.2	53K	259383	7563427
3.9	2.44461	27	53K	259383	7563427
2.8	1.84499	25.2	53K	259383	7563427
4.8	2.26011	31.7	53K	259383	7563427
1.4	1.79887	25.3	53K	259383	7563427
5.2	2.76749	32.8	53K	259383	7563427
4.8	3.09036	35.9	53K	259383	7563427
2.5	2.49074	26.1	53K	259383	7563427
2.9	1.75274	24.4	53K	259383	7563427
5.5	3.36711	39.3	53K	259383	7563427
4.7	2.81361	37.3	53K	259383	7563427
3.7	2.26011	29.8	53K	259383	7563427
5.3	2.53686	43.4	53K	259383	7563427
1.8	1.10699	21.3	53K	259383	7563427
4.1	2.12174	28.4	53K	259383	7563427
3.8	2.02949	27.3	53K	259383	7563427
5.4	2.58299	36.6	53K	259383	7563427
4.4	2.44461	35.4	53K	259383	7563427
6.2	2.95198	43	53K	259383	7563427
3.2	1.98336	21.8	53K	259383	7563427
5	2.81361	34.4	53K	259383	7563427
2.8	2.02949	28.7	53K	259383	7563427

## Sheet: Reynolds Range
Reynolds Range GRS Data
K (wt%)	U (ppm)	Th (ppm)	UTM Zone	Easting	Northing
4.35	1.79425	17.22	53K	265475	7541650
1.76	1.65127	6.41	53K	265450	7541640
4.89	1.83115	19.05	53K	265446	7541637
4.67	1.87728	16.56	53K	265435	7541623
5.85	2.19093	19.86	53K	265431	7541601
5.92	1.99259	20.97	53K	265414	7541589
4.73	1.21308	19.37	53K	265395	7541557
5.27	1.03319	18.23	53K	265368	7541551
5.32	1.61437	18.04	53K	265368	7541528
6.01	1.69278	19.05	53K	265307	7541408
6.41	1.59592	20.89	53K	265282	7541371
5.98	1.40219	19.26	53K	265278	7541366
5.55	1.33762	17.94	53K	265265	7541351
5.77	1.77119	18.32	53K	265256	7541339
5.79	1.51289	18.53	53K	265249	7541314
5.9	1.90957	17.9	53K	265243	7541315
6.1	1.57285	18.75	53K	265237	7541293
6.07	1.4806	19.83	53K	265244	7541283
6.69	1.86344	22.46	53K	265244	7541277
4.89	1.72045	16.19	53K	265226	7541256
5.17	1.49905	17.61	53K	265218	7541242
5.25	1.79887	18.61	53K	265219	7541227
6.33	2.31546	21.87	53K	265197	7541223
6.32	1.63282	21.03	53K	265184	7541221
6.09	1.5544	18.42	53K	265186	7541203
5.92	1.76197	18.08	53K	265173	7541191
5.64	1.61898	18.64	53K	265155	7541162
5.85	1.72045	19.74	53K	265144	7541157
5.37	1.84499	18.5	53K	265130	7541138
5.73	1.87267	20	53K	265117	7541124
5.98	1.84499	20.01	53K	265097	7541119
6.18	1.83577	18.59	53K	265087	7541103
5.93	1.58669	18.05	53K	265068	7541092
6.07	1.67894	21.43	53K	265057	7541080
6.3	1.85883	20.98	53K	265047	7541056
6.65	1.6282	22.15	53K	265047	7541048
5.78	1.58208	18.78	53K	265012	7541033
4.74	1.59592	14.26	53K	264997	7541011
5.91	1.56363	18.8	53K	264985	7541005
4.79	1.72045	14.14	53K	264979	7540987
4.94	1.34684	16.79	53K	264961	7540974
5.15	1.78964	18.38	53K	264944	7540962
5.17	1.94185	19.5	53K	264925	7540949
4.61	1.89573	15.82	53K	264912	7540924
7.02	2.33853	26.21	53K	265030	7540867
3.7	1.75274	14.48	53K	265068	7540888
5.76	2.13558	22.47	53K	265080	7540900
6.03	2.09406	20.58	53K	265091	7540922
6.84	2.13096	22.51	53K	265121	7540947
6.64	1.79425	21.3	53K	265158	7541014
6.42	2.09406	21.38	53K	265154	7541091
5.3	3.68998	31.4	53K	291256	7517509
6.9	4.01285	33	53K	291256	7517509
6.7	4.24348	33.4	53K	291256	7517509
4.5	3.27486	28.8	53K	291256	7517509
5.3	3.9206	33.5	53K	291256	7517509
5.5	3.87448	32.8	53K	291256	7517509
5.8	5.25822	31.8	53K	291256	7517509
6.5	4.1051	35	53K	291256	7517509
5.2	3.36711	28.4	53K	291256	7517509
4.9	3.82836	23.9	53K	291256	7517509
5.4	3.41323	29.1	53K	291256	7517509
4.8	3.27486	23.4	53K	291256	7517509
4.4	2.39849	24	53K	291256	7517509
4.9	2.30624	24.4	53K	291256	7517509
4.5	2.72136	24.2	53K	291256	7517509
5	2.76749	23.1	53K	291256	7517509
4.7	2.44461	25.2	53K	291256	7517509
4.4	2.44461	25.4	53K	291256	7517509
3.9	2.76749	25.3	53K	291251	7517592
5.1	2.16786	27.5	53K	291251	7517592
5.4	2.35236	25.5	53K	291251	7517592
4.8	2.49074	24.1	53K	291251	7517592
4.5	2.58299	20.9	53K	291251	7517592
6.5	3.78223	27.5	53K	291251	7517592
5.1	4.2896	23.5	53K	291251	7517592
6.9	5.67335	32.6	53K	291251	7517592
5.8	4.93535	36.6	53K	291251	7517592
6	7.61059	32.6	53K	291251	7517592
6.7	6.82647	32.5	53K	291251	7517592
5.1	4.70473	28.3	53K	291251	7517592
6.5	6.59584	30.7	53K	291248	7517648
5.8	4.88922	30.5	53K	291248	7517648
4.3	2.99811	35.9	53K	291248	7517648
8.1	3.36711	31.8	53K	291248	7517648
6.3	2.53686	23.8	53K	291248	7517648
6.6	2.67524	26.9	53K	291248	7517648
4.7	2.49074	23.6	53K	291248	7517648
4.7	2.49074	26.6	53K	291248	7517648
5.1	3.32098	22.7	53K	291248	7517648
5.7	2.53686	26.5	53K	291248	7517648
4.3	2.81361	24	53K	291248	7517648
5.6	2.72136	23.3	53K	291248	7517648
5.8	2.58299	24.8	53K	291248	7517648
4.6	2.49074	22.1	53K	291247	7517709
4.7	3.04423	24.8	53K	291247	7517709
4	3.09036	22.7	53K	291247	7517709
5.5	3.87448	31.4	53K	291247	7517709
6	4.2896	32	53K	291247	7517709
7	6.59584	42.2	53K	291247	7517709
6.8	5.44272	36.2	53K	291247	7517709
5	4.88922	30.4	53K	291247	7517709
3.8	4.1051	25.7	53K	291247	7517709
5.8	4.75085	31.9	53K	291247	7517709
5.7	4.19735	34.4	53K	291247	7517709
5.7	3.59773	31.4	53K	291247	7517709
3.7	2.53686	24	53K	291247	7517709
5	2.44461	24.5	53K	291245	7517795
5.4	2.30624	27.5	53K	291245	7517795
5.1	2.81361	28.3	53K	291245	7517795
6.6	3.04423	24.2	53K	291245	7517795
4.8	3.22873	26.5	53K	291245	7517795
5.8	2.62911	30.1	53K	291245	7517795
3.9	1.89112	25.4	53K	291245	7517795
5	2.62911	29.2	53K	291245	7517795
5	2.53686	26.4	53K	291245	7517795
4.5	2.16786	22.7	53K	291245	7517795
5.2	2.95198	26.8	53K	291245	7517795
5.9	2.49074	26.8	53K	282331	7522567
4.2	1.66049	23.1	53K	282331	7522567
5.1	2.35236	20.3	53K	282331	7522567
5.8	2.49074	25.1	53K	282331	7522567
3.4	2.16786	20.2	53K	282331	7522567
3.5	2.16786	22.2	53K	282331	7522567
4.6	2.30624	23.9	53K	282331	7522567
4.8	2.07561	25.3	53K	282331	7522567
5.3	2.39849	23	53K	282331	7522567
3.6	2.26011	17.2	53K	282331	7522567
4.3	2.39849	19.9	53K	282331	7522567
5.2	2.07561	26.9	53K	282331	7522567
4.3	2.26011	23.9	53K	282331	7522567
4	2.21399	17.6	53K	282331	7522567
4	2.30624	23.7	53K	282331	7522567
4.7	2.35236	23.6	53K	282331	7522567
4.4	2.12174	22.6	53K	282331	7522567
4.6	2.21399	21	53K	282331	7522567
5	1.98336	19.5	53K	282331	7522567
3.6	1.84499	20.3	53K	282331	7522567
4	2.26011	21.9	53K	282331	7522567
3.3	2.44461	19.3	53K	282331	7522567
4.3	1.70662	22.8	53K	282331	7522567
4.6	2.35236	19.9	53K	282331	7522567
4.3	1.93724	21.4	53K	282371	7522592
4.4	1.93724	23.4	53K	282371	7522592
4.6	2.26011	19.2	53K	282371	7522592
5.1	2.58299	20.9	53K	282371	7522592
4.4	2.07561	19.3	53K	282371	7522592
4.9	2.62911	20.7	53K	282371	7522592
5.5	2.67524	24.7	53K	282371	7522592
5	2.26011	23.8	53K	282371	7522592
5.1	2.21399	23.5	53K	282371	7522592
4.5	2.35236	18.7	53K	282371	7522592
4.8	2.26011	25.4	53K	282371	7522592
4.4	2.44461	23	53K	282371	7522592
5.1	2.26011	25.3	53K	282371	7522592
3.2	1.79887	20.2	53K	282371	7522592
3.6	2.21399	19.2	53K	282371	7522592
3.7	1.75274	20	53K	282371	7522592
4.2	2.90586	21.1	53K	282371	7522592
6	2.58299	27.4	53K	282371	7522592
4.5	2.21399	20.3	53K	282371	7522592
4.2	1.79887	21.2	53K	282371	7522592
5.3	2.02949	24.8	53K	282371	7522592
4.3	2.26011	23.9	53K	282371	7522592
4.1	1.61437	24.3	53K	282371	7522592
4.3	2.21399	23.3	53K	282371	7522592
4.3	1.84499	22.1	53K	282371	7522592
2.9	1.79887	18.7	53K	282371	7522592
4.3	2.16786	24.8	53K	282371	7522592
3.1	1.61437	15.7	53K	282371	7522592
3.7	1.33762	20.5	53K	282371	7522592
3.6	2.02949	18.5	53K	282371	7522592
5.3	1.93724	23.4	53K	282371	7522592
5.2	1.98336	22.4	53K	282371	7522592
3.4	1.89112	17.1	53K	277437	7528253
3.6	1.75274	14	53K	277437	7528253
3.2	2.07561	15.4	53K	277437	7528253
3.5	1.52212	14.3	53K	277437	7528253
3.9	1.61437	16.9	53K	277437	7528253
3.8	1.56824	17.3	53K	277437	7528253
4.1	2.39849	14.5	53K	277437	7528253
2.8	2.07561	16.5	53K	277437	7528253
3.9	1.93724	18.6	53K	277437	7528253
2.9	2.44461	16.3	53K	277437	7528253
2.9	2.26011	18.5	53K	277437	7528253
3.7	2.16786	14.9	53K	277437	7528253
3.4	1.75274	17	53K	277437	7528253
2.1	1.61437	16.1	53K	277437	7528253
5.4	2.53686	20.1	53K	277437	7528253
4.2	2.39849	19.2	53K	277437	7528253
2.4	1.29149	13.7	53K	277437	7528253
1.2	1.61437	14.3	53K	277509	7528305
3	1.19924	14.3	53K	277509	7528305
4.7	2.85974	25.1	53K	277509	7528305
4.7	1.98336	20.9	53K	277509	7528305
4.7	2.62911	22.6	53K	277509	7528305
5.5	2.26011	24.5	53K	277509	7528305
3.1	1.93724	18.5	53K	277509	7528305
3.5	1.84499	19.3	53K	277509	7528305
3.2	2.02949	18.6	53K	277509	7528305
3.3	2.35236	23.3	53K	277509	7528305
3.6	2.95198	20.5	53K	277509	7528305
3.1	2.76749	18.8	53K	277509	7528305
3.5	1.93724	17.1	53K	277509	7528305
2.2	1.66049	12.2	53K	277509	7528305
5.3	2.26011	23.5	53K	277509	7528305
5.6	2.21399	23.7	53K	277509	7528305
4.1	2.76749	19.6	53K	277509	7528305
4.9	3.04423	19.2	53K	277509	7528305
4.2	3.04423	19.7	53K	277509	7528305
4.1	2.49074	20.9	53K	277509	7528305
4.9	2.44461	21.2	53K	277509	7528305
3.9	2.76749	20.1	53K	277509	7528305
3.5	2.26011	19	53K	277509	7528305
3.8	2.07561	15.1	53K	277509	7528305
4.5	2.39849	16.9	53K	277509	7528305
3.9	2.16786	17.9	53K	277509	7528305
3.5	2.12174	14.1	53K	277509	7528305
3.2	1.66049	17.5	53K	277509	7528305
4.1	1.42987	16.7	53K	277509	7528305
3.7	1.38374	17.3	53K	277509	7528305
4.5	2.16786	17.3	53K	277509	7528305
2.9	1.84499	14.8	53K	277509	7528305
5	3.13648	20.6	53K	277509	7528305
4.1	3.59773	20.7	53K	277509	7528305
2.2	2.16786	17.3	53K	277509	7528305
3.6	2.12174	15.7	53K	277509	7528305
4.1	2.76749	18.3	53K	277509	7528305
7.1	1.89112	23.6	53K	277509	7528305
4.8	1.66049	17.3	53K	277509	7528305
7	2.21399	23.6	53K	277509	7528305
4.9	1.89112	17.2	53K	277509	7528305
4	2.02949	20.2	53K	277509	7528305
3.8	1.56824	16.8	53K	277509	7528305
4.1	1.66049	16.6	53K	277672	7528335
3.8	2.07561	19.1	53K	277672	7528335
5.7	2.02949	21.5	53K	277672	7528335
7.3	2.95198	27.2	53K	277672	7528335
7	2.90586	25.8	53K	277672	7528335
7.2	3.55161	28.2	53K	277672	7528335
4.1	2.39849	21.8	53K	277672	7528335
3.3	2.07561	20.2	53K	277672	7528335
4	2.26011	21	53K	277672	7528335
3.5	3.27486	18.8	53K	277672	7528335
4.4	3.55161	22.3	53K	277672	7528335
4.9	2.72136	20.3	53K	277672	7528335
3.6	3.04423	20.7	53K	277672	7528335
3.8	1.98336	18.3	53K	277672	7528335
3.4	2.26011	20.2	53K	277672	7528335
6.7	2.85974	25.1	53K	277740	7528392
6.1	3.18261	23.2	53K	277740	7528392
5.2	2.58299	22.1	53K	277740	7528392
5.1	2.44461	21.4	53K	277740	7528392
5.2	2.53686	22.7	53K	277740	7528392
5	2.72136	20.5	53K	277740	7528392
5.5	3.04423	25.5	53K	277740	7528392
5.2	3.27486	24.7	53K	277740	7528392
5.5	3.09036	22.7	53K	277740	7528392
3.6	2.30624	18.7	53K	277740	7528392
4.7	1.89112	21.6	53K	277740	7528392
3.2	2.07561	15.7	53K	277740	7528392
2.7	1.84499	16.1	53K	277740	7528392
3.4	1.70662	15.9	53K	277740	7528392
4	1.61437	17.8	53K	277740	7528392
4.3	2.39849	18.2	53K	277740	7528392
2.5	2.21399	15.1	53K	277740	7528392
3.6	1.89112	19.8	53K	277740	7528392
3.4	2.30624	18.2	53K	277740	7528392
3.3	1.98336	18	53K	277740	7528392
3	2.39849	17.4	53K	277740	7528392
4	2.26011	19.4	53K	277740	7528392
2.9	2.49074	23.6	53K	277740	7528392
4.4	1.79887	19.7	53K	277740	7528392
4.4	2.02949	20.1	53K	277740	7528392
3.6	1.61437	17.5	53K	277740	7528392
2	1.89112	14.4	53K	277810	7528464
3.5	1.42987	20.6	53K	277810	7528464
5	2.58299	24.7	53K	277810	7528464
5.6	2.62911	23.7	53K	277810	7528464
5.1	2.02949	23.6	53K	277810	7528464
6.4	2.72136	28.2	53K	277810	7528464
3	2.49074	22.4	53K	277810	7528464
3.5	1.98336	21.5	53K	277810	7528464
2.9	2.07561	19.3	53K	277810	7528464
2.7	1.98336	20.4	53K	277810	7528464
2.5	2.99811	19.8	53K	277810	7528464
2.3	1.75274	19.5	53K	277810	7528464
4.4	3.22873	22.7	53K	277850	7528523
3.6	2.49074	22.3	53K	277850	7528523
6	2.99811	23.9	53K	277850	7528523
5	2.35236	21.3	53K	277850	7528523
4.7	1.89112	23.9	53K	277850	7528523
4.4	1.93724	20.9	53K	277850	7528523
4.2	3.04423	21.8	53K	277850	7528523
5.3	2.58299	25.1	53K	277850	7528523
5.2	2.49074	23.8	53K	277850	7528523
4	2.53686	24	53K	277850	7528523
3.4	2.30624	24.9	53K	277850	7528523
5.24	1.27304	29.93	53K	304528	7508062
5.86	1.31456	30.96	53K	304533	7508073
6.34	1.57747	34.69	53K	304543	7508077
3	1.08854	20.29	53K	304547	7508096
4.94	1.11622	27.11	53K	304556	7508140
4.88	1.59592	29.92	53K	304562	7508156
4.28	1.44371	23.65	53K	304550	7508162
5.49	1.28227	31.27	53K	304570	7508156
3.84	0.830246	20.71	53K	304550	7508165
5.9	1.00552	31.66	53K	304560	7508177
5.3	1.34223	30.4	53K	304567	7508177
6.75	1.10699	34.42	53K	304566	7508178
5.06	1.26843	28.11	53K	304571	7508189
5.15	1.69278	36.82	53K	304572	7508191
5.92	1.40681	31.95	53K	304575	7508199
6.47	1.42064	30.99	53K	304575	7508197
4.28	1.36529	30.98	53K	304572	7508201
4.33	0.996295	26.82	53K	304581	7508202
5.53	1.05626	28.12	53K	304578	7508210
3.83	1.01474	22.86	53K	304575	7508215
3.48	1.07009	22.81	53K	304586	7508218
4.94	1.18541	28.51	53K	304536	7508220
5.1	1.22692	25.87	53K	304592	7508236
4.56	1.16234	30.59	53K	304603	7508246
4.58	1.47599	27.4	53K	304600	7508256
5.13	1.11622	24.9	53K	304602	7508276
5.04	1.24537	25.91	53K	304600	7508270
4.44	1.27766	20.29	53K	303693	7507963
7.08	1.34684	27.73	53K	303894	7508170
6.63	1.13467	30.2	53K	303900	7508208
5.46	1.36529	28.18	53K	303902	7508213
3.78	1.18541	23.4	53K	303933	7508575
4.98	1.60053	28.89	53K	303935	7508582
5.16	1.74813	29.42	53K	303950	7508608
4.97	1.20386	25.83	53K	303975	7508621
5.79	1.34223	28.98	53K	303935	7508628
4.04	1.43909	28.1	53K	304011	7508644
4.57	1.36068	27.46	53K	304014	7508652
5.2	1.45754	30	53K	304031	7508650
4.56	2.17248	42.65	53K	304039	7508656
4.75	1.34684	30.88	53K	304045	7508666
4.93	1.5175	26.46	53K	304060	7508679
4.66	1.70662	30.17	53K	304073	7508682
3.76	1.5175	25.8	53K	304084	7508688
4.9	2.21399	24.1	53K	279626	7525845
3.8	2.12174	21.3	53K	279626	7525845
4.1	1.75274	21.6	53K	279626	7525845
4.4	1.93724	18.1	53K	279626	7525845
5.2	2.26011	22.6	53K	279626	7525845
4.6	1.93724	20.8	53K	279626	7525845
4.1	1.75274	22.3	53K	279626	7525845
4.6	1.84499	22.7	53K	279626	7525845
3.2	1.66049	20.5	53K	279626	7525845
2.8	1.19924	18.3	53K	279626	7525845
5	1.79887	28.3	53K	284769	7522022
4.5	1.56824	22.3	53K	284769	7522022
5.1	1.79887	30.2	53K	284769	7522022
4.4	1.52212	23.5	53K	284769	7522022
4.4	2.53686	23.5	53K	284769	7522022
2.3	1.61437	18.8	53K	284769	7522022
2.1	1.10699	14.5	53K	284769	7522022
4.8	1.56824	21.6	53K	284769	7522022
3.9	1.47599	24.6	53K	284769	7522022
4.8	1.75274	23.3	53K	284769	7522022
4.8	2.30624	22.2	53K	284769	7522022
5	1.61437	20.3	53K	284769	7522022
4.2	1.89112	19.3	53K	284769	7522022
5.9	2.16786	24.7	53K	284769	7522022
4	1.93724	22	53K	284769	7522022
3.2	1.56824	22.3	53K	284769	7522022
3.1	1.56824	17.4	53K	284769	7522022
4.7	1.75274	24	53K	284769	7522022
4.2	1.61437	22.5	53K	288687	7519263
4.4	1.56824	21.7	53K	288687	7519263
3.9	1.75274	22.2	53K	288687	7519263
3.3	1.61437	20.7	53K	288687	7519263
5.4	1.70662	22.7	53K	288687	7519263
4.6	1.38374	20	53K	288687	7519263
5.7	2.02949	15.7	53K	288687	7519263
5.3	2.16786	19.8	53K	288687	7519263
4.6	1.84499	18.9	53K	288687	7519263
6.2	2.16786	20.2	53K	288687	7519263
4.1	1.89112	23	53K	288687	7519263
4.3	1.89112	21.4	53K	288687	7519263
3.7	1.38374	25.8	53K	288687	7519263
3.7	0.922495	22	53K	288687	7519263
3.4	1.93724	19	53K	288687	7519263
4.2	1.84499	20.5	53K	288687	7519263
3.6	2.12174	23.3	53K	295396	7515652
4.1	1.52212	23.8	53K	295396	7515652
3.4	1.70662	22.9	53K	295396	7515652
5.1	1.98336	24.9	53K	295396	7515652
5	1.75274	24.5	53K	295396	7515652
4.1	1.66049	20.8	53K	295396	7515652
3	1.66049	18.9	53K	295396	7515652
4.5	1.98336	19.3	53K	295396	7515652
3.6	1.79887	20.2	53K	295396	7515652
3.6	1.66049	23.1	53K	295396	7515652
5.2	1.93724	26.2	53K	295396	7515652
2.9	1.61437	19.1	53K	295396	7515652
3.6	1.70662	19.2	53K	295396	7515652
4.7	1.61437	26.9	53K	295396	7515652
5.2	1.38374	24.8	53K	295396	7515652
3.8	1.84499	23.4	53K	300758	7512715
4.1	1.38374	24.2	53K	300758	7512715
3.8	1.19924	23.9	53K	300758	7512715
2.1	1.06087	20.9	53K	300758	7512715
3.9	1.29149	23.3	53K	300758	7512715
3.6	1.29149	22.5	53K	300758	7512715
3.2	2.02949	23.1	53K	300758	7512715
4	1.79887	24.7	53K	300758	7512715
5.1	2.08484	19.5	53K	300758	7512715
4	1.56824	19.4	53K	300758	7512715
4.2	1.66049	21.4	53K	300758	7512715
2.2	1.24537	17.4	53K	300758	7512715
3.9	0.96862	22.9	53K	305217	7508546
3.2	1.89112	21.4	53K	305217	7508546
3.1	1.47599	22.5	53K	305217	7508546
3.3	1.52212	24.4	53K	305217	7508546
3.6	1.29149	20.2	53K	305217	7508546
3.6	1.24537	26.8	53K	305217	7508546
3.6	1.52212	23.3	53K	305217	7508546
3.7	2.02949	26.7	53K	305217	7508546
3.4	1.61437	24.1	53K	305217	7508546

## Sheet: Sierra De Quilmes
Sierra De Quilmes GRS Data
K (wt%)	U (ppm)	Th (ppm)	UTM Zone	Easting	Northing
3	1.52212	16.1	20J	200717	7097754
3.2	1.70662	16.8	20J	200717	7097754
4.2	2.07561	23.1	20J	200717	7097754
3.9	1.89112	17.6	20J	200717	7097754
2.9	1.79887	15.4	20J	200717	7097754
3.1	1.52212	17.2	20J	200717	7097754
3.8	1.75274	21.8	20J	200717	7097754
4.3	2.21399	19.9	20J	200717	7097754
3.2	1.66049	19.1	20J	200717	7097754
2.9	1.52212	16.1	20J	200717	7097754
3.1	1.84499	20	20J	200717	7097754
3.1	1.52212	14	20J	200717	7097754
4.1	1.98336	17.7	20J	200717	7097754
4.3	2.07561	24	20J	200717	7097754
3.6	1.33762	21.8	20J	200717	7097754
3.3	1.61437	15.8	20J	200717	7097754
3.6	1.84499	16.3	20J	200717	7097754
3.4	1.70662	15.5	20J	200717	7097754
3.6	1.93724	18.1	20J	200717	7097754
3.5	2.12174	18.9	20J	201457	7097766
2.7	1.66049	16.3	20J	201457	7097766
2.6	1.42987	15.6	20J	201457	7097766
2.9	1.66049	15.2	20J	201457	7097766
2.8	1.98336	20.2	20J	201457	7097766
2.9	1.06087	17	20J	201457	7097766
3.8	1.70662	24.2	20J	201457	7097766
3.4	2.58299	20.2	20J	201457	7097766
3.6	1.29149	21.5	20J	201457	7097766
4.1	2.12174	28.6	20J	201457	7097766
3.7	2.76749	22.6	20J	201457	7097766
4.9	1.29149	29.6	20J	201457	7097766
4.7	2.26011	26.7	20J	201457	7097766
3.7	2.58299	26.8	20J	201457	7097766
3.5	2.26011	20.9	20J	201457	7097766
4.7	2.12174	27.4	20J	201457	7097766
3	2.44461	19.6	20J	201457	7097766
5.6	2.85974	26.1	20J	201457	7097766
2.6	2.16786	14.3	20J	201717	7105930
3.1	2.53686	21	20J	201717	7105930
4.1	3.18261	18.6	20J	201717	7105930
3.4	2.58299	18.3	20J	201717	7105930
4.3	2.67524	20.6	20J	201717	7105930
3.7	2.30624	17.9	20J	201717	7105930
2.8	1.89112	17.2	20J	201717	7105930
2.8	2.49074	16.8	20J	201717	7105930
2.9	1.47599	14	20J	201792	7106304
4.2	2.12174	19.8	20J	201792	7106304
3	1.79887	15.8	20J	201792	7106304
3.1	1.61437	17	20J	201792	7106304
3.5	2.35236	16	20J	201792	7106304
3.9	1.84499	17.8	20J	201792	7106304
3.1	3.22873	26.6	20J	201948	7106562
2.1	5.11985	14.7	20J	201948	7106562
3.2	4.15123	38.4	20J	201948	7106562
1.6	5.07372	13.3	20J	201948	7106562
1.4	3.18261	13.1	20J	201948	7106562
4.5	2.81361	18.4	20J	201948	7106562
4.1	2.53686	16.3	20J	201948	7106562
3.9	2.35236	15.6	20J	201948	7106562
3.1	2.30624	14.1	20J	201948	7106562
2.5	3.27486	26.8	20J	201948	7106562
2.5	2.39849	16.6	20J	201948	7106562
2.8	1.98336	17.9	20J	201948	7106562
2.9	2.26011	15.4	20J	201948	7106562
1.5	1.29149	7.8	20J	204059	7105244
2.9	1.98336	14	20J	204059	7105244
0.9	1.24537	8	20J	204059	7105244
2.5	2.30624	14.6	20J	204059	7105244
2.3	1.79887	12.2	20J	204059	7105244
2.1	1.52212	10.6	20J	204059	7105244
2.5	1.75274	15	20J	204059	7105244
3	2.12174	15.4	20J	204059	7105244
2.5	1.98336	13.9	20J	204059	7105244
2.3	1.98336	11.9	20J	204059	7105244
3	2.16786	13.6	20J	204883	7096382
3.5	2.16786	15.3	20J	204883	7096382
3.2	1.89112	15.9	20J	204883	7096382
3.5	1.98336	19.4	20J	204883	7096382
3.1	1.98336	16.7	20J	204883	7096382
3.2	2.21399	14.8	20J	204883	7096382
3.9	2.30624	13.4	20J	204883	7096382
2.6	2.35236	12.8	20J	204883	7096382
1.9	1.98336	12.3	20J	204883	7096382
3.3	2.21399	14.1	20J	204883	7096382
1.7	2.26011	14.4	20J	204883	7096382
3.6	1.89112	15.7	20J	204883	7096382
3.5	2.44461	18.4	20J	204883	7096382
2.9	2.16786	14.4	20J	204883	7096382
3.3	2.35236	16.8	20J	204883	7096382
4.1	2.12174	19.6	19J	796077	7120675
4.7	2.49074	22.7	19J	796077	7120675
4.4	2.26011	25.2	19J	796077	7120675
3.5	2.02949	22.6	19J	796077	7120675
4.7	2.12174	23.4	19J	796077	7120675
4.7	2.62911	22.7	19J	796077	7120675
5	2.99811	23.3	19J	796077	7120675
5.7	2.39849	25.1	19J	796077	7120675
5.7	2.39849	25.1	19J	796077	7120675
3.1	2.53686	18.1	19J	796351	7108014
3.4	2.21399	17.3	19J	796351	7108014
3.4	1.93724	20.5	19J	796351	7108014
2.6	1.61437	14.1	19J	796351	7108014
3.1	2.16786	17.3	19J	796351	7108014
2.9	1.52212	15.2	19J	796351	7108014
3.2	2.16786	19.6	19J	796351	7108014
2.8	1.98336	15.6	19J	796351	7108014
3.4	2.26011	18.3	19J	796351	7108014
2.1	1.70662	12.9	19J	796351	7108014
4.7	2.02949	19.5	19J	796781	7135574
4.9	2.30624	19.5	19J	796781	7135574
4.2	2.35236	17.5	19J	796781	7135574
5	2.07561	19.6	19J	796781	7135574
5.3	2.62911	23.3	19J	796781	7135574
4.9	1.61437	19.1	19J	796781	7135574
3.9	1.61437	15.7	19J	796781	7135574
4.4	2.16786	19.9	19J	796781	7135574
3.4	2.07561	19.9	19J	796883	7108420
3.1	2.02949	18.8	19J	796883	7108420
3.3	2.53686	18.2	19J	796883	7108420
3.4	2.58299	18.9	19J	796883	7108420
3.4	2.02949	18.4	19J	796883	7108420
3.2	2.16786	17.4	19J	796883	7108420
3.1	2.21399	17.2	19J	796883	7108420
3.7	2.21399	17.9	19J	796883	7108420
3	2.02949	15.1	19J	796883	7108420
3.3	1.84499	19	19J	796883	7108420
4.4	1.15312	17.3	19J	796959	7086394
2.8	1.33762	9.7	19J	796959	7086394
3.7	1.47599	44.4	19J	796959	7086394
4.2	1.38374	33.4	19J	796959	7086394
3.8	1.66049	18	19J	796959	7086394
2.1	1.93724	29.8	19J	796959	7086394
3.8	1.47599	20.9	19J	796959	7086394
4.1	2.39849	31.1	19J	796959	7086394
3.7	1.24537	17.5	19J	796959	7086394
4.2	1.01474	40.6	19J	796959	7086394
4	0.645747	27.3	19J	796997	7087473
3.4	1.38374	26.9	19J	796997	7087473
3.8	1.24537	24.4	19J	796997	7087473
3.1	1.19924	29	19J	796997	7087473
3.5	1.47599	24.5	19J	796997	7087473
3.9	1.29149	22.2	19J	796997	7087473
3.6	1.42987	21.1	19J	796997	7087473
3.2	1.01474	16.6	19J	796997	7087473
3.7	1.47599	25.7	19J	796997	7087473
3.7	0.737996	18.5	19J	796997	7087473
3.8	1.33762	33.1	19J	796997	7087473
4	1.19924	24.6	19J	796997	7087473
3.4	2.30624	27.7	19J	796997	7087473
4.3	2.12174	27.5	19J	796997	7087473
2.9	1.75274	28.7	19J	796997	7087473
3.5	0.96862	20.7	19J	796997	7087473
3.8	1.33762	30.2	19J	797044	7087739
3.3	1.66049	33.5	19J	797044	7087739
4.6	1.01474	26	19J	797044	7087739
4.3	1.47599	20	19J	797044	7087739
3.4	1.47599	26.9	19J	797044	7087739
3.7	1.70662	22.5	19J	797044	7087739
4.2	1.61437	23.8	19J	797044	7087739
3	1.10699	26.1	19J	797044	7087739
2.9	1.10699	27	19J	797044	7087739
3.2	0.876371	20.5	19J	797044	7087739
2.4	1.15312	16.8	19J	797044	7087739
3.4	1.38374	28.3	19J	797044	7087739
2.4	1.52212	19.7	19J	797118	7087870
3.3	1.61437	21.9	19J	797118	7087870
2.7	1.10699	18.9	19J	797118	7087870
2.4	1.47599	20.8	19J	797118	7087870
1.8	1.24537	18.2	19J	797118	7087870
3.5	1.61437	24.5	19J	797118	7087870
2	1.61437	18	19J	797118	7087870
2.1	1.33762	20.1	19J	797118	7087870
2.2	0.784121	16.2	19J	797118	7087870
2.6	1.06087	17.7	19J	797118	7087870
2.8	1.29149	19.8	19J	797415	7085799
2.6	1.47599	20.1	19J	797415	7085799
3.9	1.24537	24.5	19J	797415	7085799
2.1	0.96862	19.6	19J	797415	7085799
2.9	1.24537	20.5	19J	797415	7085799
2.8	1.10699	21.1	19J	797415	7085799
3.3	1.56824	21.7	19J	797415	7085799
2.7	2.07561	13.4	19J	797518	7122686
3.5	1.93724	17.4	19J	797518	7122686
2.8	2.02949	18.2	19J	797518	7122686
4	1.93724	18.3	19J	797518	7122686
3.6	2.16786	16.8	19J	797518	7122686
3	1.79887	16.4	19J	797518	7122686
3.4	2.16786	15.8	19J	797518	7122686
3	1.66049	14.3	19J	797518	7122686
3.4	1.38374	16.2	19J	797622	7122756
4.1	1.70662	18.3	19J	797622	7122756
3.4	2.16786	16.4	19J	797622	7122756
3.2	1.93724	14	19J	797622	7122756
2.7	1.19924	14.6	19J	797622	7122756
2.7	1.66049	11.3	19J	797622	7122756
2.7	1.56824	14.1	19J	797622	7122756
1.5	0.922495	9.6	19J	797861	7122846
3	1.61437	12.8	19J	797861	7122846
1.3	1.01474	8.8	19J	797861	7122846
2.8	1.47599	12.1	19J	797861	7122846
3.9	1.93724	17.2	19J	797861	7122846
3	1.56824	13.8	19J	797861	7122846
3	1.33762	15.2	19J	798002	7122989
4	1.70662	18.1	19J	798002	7122989
3.3	1.38374	15.7	19J	798002	7122989
4	1.98336	17.5	19J	798002	7122989
4.5	1.70662	20.7	19J	798002	7122989
3.9	1.75274	18.1	19J	798002	7122989
3.1	1.66049	14.3	19J	798002	7122989
4	1.93724	18.1	19J	798002	7122989
2.3	1.61437	14.5	19J	798434	7123338
2.4	1.47599	15.2	19J	798434	7123338
2.6	1.98336	15.4	19J	798434	7123338
2.5	1.19924	16.1	19J	798434	7123338
2.8	1.70662	15.2	19J	798434	7123338
2.6	2.02949	14.9	19J	798434	7123338
5.1	1.84499	21.6	19J	798565	7123522
3.9	1.42987	18.6	19J	798565	7123522
3.4	1.61437	19.2	19J	798565	7123522
3.5	1.56824	17.6	19J	798565	7123522
4.4	2.26011	21.4	19J	798565	7123522
3.8	1.89112	15.8	19J	798565	7123522
2.2	1.10699	19.1	19J	798565	7123522
3.1	1.66049	17.8	19J	798565	7123522
